# Supplementary material
Source: bioRxiv or medRxiv preprint supplement (http://www.biorxiv.org/highwire/filestream/31120/field_highwire_adjunct_files/0/108134-1.pdf)
Supplement: Supplementary file [file 108134-1.pdf]

<sup>645</sup> **Supplementary Figures and Tables**

| Chr | Gene      | Reported Genes within 1Mb Locus      | Model                               | DIAGRAM Z-score | DIAGRAM P-value | GERA Z-score | GERA P-value | Meta-analysis Z-score | Meta-analysis P-value |
|-----|-----------|--------------------------------------|-------------------------------------|-----------------|-----------------|--------------|--------------|-----------------------|-----------------------|
| 3   | IGF2BP2   | C3orf65,IGF2BP2                      | Thyroid                             | 7.5             | 8.6e-14         | 5.9          | 4.8e-09      | 8.8                   | 1.1e-18               |
| 4   | WFS1      | WFS1,PPP2R2C                         | Brain-Cerebellum                    | 5.2             | 1.6e-07         | 3.9          | 0.00011      | 6.2                   | 5.7e-10               |
| 4   | WFS1      | WFS1,PPP2R2C                         | Nerve-Tibial                        | 5.5             | 3.7e-08         | 4.5          | 6.5e-06      | 6.4                   | 1.7e-10               |
| 4   | WFS1      | WFS1,PPP2R2C                         | Skin-Not-Sun-Exposed-Suprapubic     | 5.3             | 1.4e-07         | 5            | 5.5e-07      | 6.6                   | 4.6e-11               |
| 4   | WFS1      | WFS1,PPP2R2C                         | Skin-Sun-Exposed-Lower-leg          | 5.7             | 1.1e-08         | 4.6          | 4.7e-06      | 6.6                   | 4.3e-11               |
| 4   | WFS1      | WFS1,PPP2R2C                         | Thyroid                             | 5.4             | 7.8e-08         | 4.7          | 2.1e-06      | 6.6                   | 3.5e-11               |
| 6   | ID4       | CDKAL1                               | Vagina                              | -6.2            | 6.3e-10         | -4.7         | 2.4e-06      | -7.9                  | 2.1e-15               |
| 6   | HLA-A     | none reported                        | Skin-Sun-Exposed-Lower-leg          | 5.4             | 5.1e-08         | 0.68         | 0.5          | 4.5                   | 7.5e-06               |
| 7   | JAZF1     | JAZF1                                | Adipose-Subcutaneous                | -7              | 3.3e-12         | -6.8         | 9.8e-12      | -8.5                  | 2.4e-17               |
| 7   | JAZF1     | JAZF1                                | Adipose-Visceral-Omentum            | -8.1            | 3.7e-16         | -5.8         | 5.5e-09      | -9.5                  | 3.1e-21               |
| 7   | JAZF1     | JAZF1                                | Artery-Aorta                        | -5.9            | 4.7e-09         | -4.7         | 2e-06        | -6.8                  | 7.5e-12               |
| 7   | JAZF1     | JAZF1                                | Artery-Tibial                       | -7.2            | 4.8e-13         | -6.8         | 1.5e-11      | -9                    | 2e-19                 |
| 7   | JAZF1     | JAZF1                                | Cells-Transformed-fibroblasts       | -7              | 3.1e-12         | -3.9         | 0.00012      | -7.2                  | 6.5e-13               |
| 7   | JAZF1     | JAZF1                                | Muscle-Skeletal                     | -8.5            | 2.5e-17         | -5.6         | 2.4e-08      | -9.4                  | 5.9e-21               |
| 7   | JAZF1     | JAZF1                                | Pancreas                            | -7              | 1.8e-12         | -5.5         | 3.2e-08      | -8.3                  | 1.3e-16               |
| 8   | CCNE2     | DPY19L4,INTS8,CCNE2,TP53INP1,NDUFAF6 | Whole-Blood-DGN                     | -5.5            | 9e-08           | -1           | 0.31         | -4.7                  | 3e-06                 |
| 8   | TP53INP1  | DPY19L4,INTS8,CCNE2,TP53INP1,NDUFAF6 | Skin-Sun-Exposed-Lower-leg          | -5.3            | 1.2e-07         | -0.43        | 0.66         | -4.2                  | 2.2e-05               |
| 8   | TP53INP1  | DPY19L4,INTS8,CCNE2,TP53INP1,NDUFAF6 | Testis                              | -5.4            | 6.9e-08         | -0.57        | 0.57         | -4.6                  | 5.1e-06               |
| 8   | TP53INP1  | DPY19L4,INTS8,CCNE2,TP53INP1,NDUFAF6 | Whole-Blood-DGN                     | 5.2             | 1.9e-07         | 0.98         | 0.33         | 4.4                   | 1.1e-05               |
| 9   | CDKN2A    | CDKN2B,DMRTA1                        | Adrenal-Gland                       | -5.7            | 1.1e-08         | -3           | 0.003        | -6.2                  | 4.5e-10               |
| 9   | ANKRD20A1 | none reported                        | Breast-Mammary-Tissue               | 5.5             | 4.4e-08         | 0.92         | 0.36         | 4.8                   | 1.9e-06               |
| 10  | CAMK1D    | CDC123,CAMK1D                        | Whole-Blood                         | 6               | 2.4e-09         | 3.4          | 0.00066      | 6.3                   | 2.9e-10               |
| 10  | CAMK1D    | CDC123,CAMK1D                        | Whole-Blood-DGN                     | 5.3             | 8.9e-08         | 3.7          | 0.00018      | 5.9                   | 4.7e-09               |
| 10  | NUDT5     | CDC123,CAMK1D                        | Whole-Blood-DGN                     | 5.7             | 1.1e-08         | 3.5          | 0.00049      | 6                     | 2e-09                 |
| 10  | HHEX      | IDE,KIF11,HHEX                       | Cells-Transformed-fibroblasts       | -6.9            | 5.9e-12         | -3.8         | 0.00013      | -7.1                  | 1.2e-12               |
| 10  | HHEX      | IDE,KIF11,HHEX                       | Whole-Blood-DGN                     | -6.3            | 3.2e-10         | -2.8         | 0.0046       | -6.1                  | 9.3e-10               |
| 10  | CYP28C1   | IDE,KIF11,HHEX                       | Adipose-Subcutaneous                | -6.4            | 1.5e-10         | -2.8         | 0.0053       | -6.1                  | 9.3e-10               |
| 10  | CWF19L1   | none reported                        | Breast-Mammary-Tissue               | -5.5            | 4.6e-08         | -0.76        | 0.45         | -4.7                  | 2.9e-06               |
| 10  | TCF7L2    | TCF7L2                               | Artery-Aorta                        | -9.5            | 2.5e-21         | -8.9         | 8.7e-19      | -12                   | 2e-31                 |
| 10  | DCLRE1A   | TCF7L2                               | Cells-Transformed-fibroblasts       | 5.9             | 3.3e-09         | 5.2          | 2e-07        | 7                     | 1.8e-12               |
| 10  | DCLRE1A   | TCF7L2                               | Thyroid                             | -7.4            | 1.1e-13         | -5           | 4.7e-07      | -8.4                  | 4.9e-17               |
| 11  | NCR3LG1   | NCR3LG1,KCNJ11,ABCC8                 | Breast-Mammary-Tissue               | -5.7            | 1.5e-08         | -3.9         | 8.4e-05      | -6.4                  | 1.3e-10               |
| 11  | NCR3LG1   | NCR3LG1,KCNJ11,ABCC8                 | Esophagus-Mucosa                    | -5.4            | 8.4e-08         | -2.8         | 0.0044       | -5.6                  | 2.7e-08               |
| 11  | NCR3LG1   | NCR3LG1,KCNJ11,ABCC8                 | Nerve-Tibial                        | -5.6            | 2.6e-08         | -3.3         | 0.00092      | -5.8                  | 5e-09                 |
| 15  | AP3S2     | AP3S2,PRC1,VPS33B                    | Small-Intestine-Terminal-Ileum      | 5.2             | 1.9e-07         | 3.5          | 0.00046      | 6.3                   | 2.2e-10               |
| 15  | RCCD1     | AP3S2,PRC1,VPS33B                    | Artery-Aorta                        | 5.4             | 6e-08           | 3.1          | 0.0022       | 5.7                   | 1.4e-08               |
| 15  | RCCD1     | AP3S2,PRC1,VPS33B                    | Artery-Tibial                       | 5.3             | 1.5e-07         | 3.4          | 0.00077      | 5.8                   | 7.8e-09               |
| 15  | RCCD1     | AP3S2,PRC1,VPS33B                    | Brain-Cortex                        | 5.7             | 1.4e-08         | 3.1          | 0.0018       | 6.2                   | 5.7e-10               |
| 15  | RCCD1     | AP3S2,PRC1,VPS33B                    | Brain-Frontal-Cortex-BA9            | 5.7             | 1.5e-08         | 3            | 0.0031       | 6.3                   | 2.7e-10               |
| 15  | RCCD1     | AP3S2,PRC1,VPS33B                    | Breast-Mammary-Tissue               | 5.2             | 1.6e-07         | 2.7          | 0.0079       | 5.5                   | 4.9e-08               |
| 15  | RCCD1     | AP3S2,PRC1,VPS33B                    | Colon-Sigmoid                       | 5.5             | 4.9e-08         | 2.6          | 0.0097       | 5.7                   | 1.3e-08               |
| 15  | RCCD1     | AP3S2,PRC1,VPS33B                    | Colon-Transverse                    | 5.5             | 4.9e-08         | 3.2          | 0.0013       | 5.8                   | 5.5e-09               |
| 15  | RCCD1     | AP3S2,PRC1,VPS33B                    | Esophagus-Gastroesophageal-Junction | 5.4             | 5.1e-08         | 2.4          | 0.015        | 5.7                   | 1.4e-08               |
| 15  | RCCD1     | AP3S2,PRC1,VPS33B                    | Nerve-Tibial                        | 5.5             | 3e-08           | 3.2          | 0.0014       | 5.8                   | 7.9e-09               |
| 15  | RCCD1     | AP3S2,PRC1,VPS33B                    | Skin-Not-Sun-Exposed-Suprapubic     | 5.2             | 1.8e-07         | 3            | 0.0027       | 5.6                   | 2.8e-08               |
| 15  | RCCD1     | AP3S2,PRC1,VPS33B                    | Skin-Sun-Exposed-Lower-leg          | 5.2             | 2.2e-07         | 3.1          | 0.0019       | 5.5                   | 4.5e-08               |
| 15  | RCCD1     | AP3S2,PRC1,VPS33B                    | Stomach                             | 5.7             | 1.4e-08         | 3.2          | 0.0012       | 6.2                   | 6.1e-10               |
| 15  | RCCD1     | AP3S2,PRC1,VPS33B                    | Testis                              | 5.2             | 2.1e-07         | 3.2          | 0.0015       | 5.7                   | 1e-08                 |
| 15  | HMG20A    | PEAK1,HMG20A,LINGO1                  | Pituitary                           | 5.5             | 4.5e-08         | 3.4          | 0.00065      | 6.2                   | 6.7e-10               |

**Table S1. Bonferroni significant T2D associated genes from the trans-ethnic MetaXcan study.** Results for genes and corresponding models that meet Bonferroni significance in the trans-ethnic analysis are shown with nearby genes and results from the GERA replication study and meta-analysis of the trans-ethnic and GERA Metaxcan associations. 20 genes pass the stringent Bonferroni correction. Blue shading denotes putative novel T2D genes that are not the most proximal to GWAS associations at  $p < 5 \times 10^{-6}$ . Replication in the GERA study at  $FDR_{rep} < 0.05$  is denoted by a pink outline. Pink and red shading denote Bonferroni significance in at least one model and across all models, respectively, for results from meta-analysis of MetaXcan results.

Attached file t2d-discovery-FDR-0.05.csv

**Table S2. Significant associations between predicted expression and T2D.**

| Chr | Gene           | Reported Genes within 1Mb Locus  | Model                                | DIAGRAM Z-score | DIAGRAM P-value | GERA Z-score | GERA P-value | Meta-analysis Z-score | Meta-analysis P-value |
|-----|----------------|----------------------------------|--------------------------------------|-----------------|-----------------|--------------|--------------|-----------------------|-----------------------|
| 1   | <i>CEP85</i>   | none reported                    | Brain–Anterior–cingulate–cortex–BA24 | -4.2            | 2.2e-05         | -1.4         | 0.17         | -4.3                  | 2e-05                 |
| 1   | <i>UBIAD1</i>  | none reported                    | Breast–Mammary–Tissue                | 4.1             | 4.1e-05         | -0.19        | 0.85         | 3.1                   | 0.0018                |
| 1   | <i>CD101</i>   | none reported                    | Whole–Blood–DGN                      | 4.1             | 3.6e-05         | 1.6          | 0.1          | 3.9                   | 9.3e-05               |
| 2   | <i>RIF1</i>    | none reported                    | Brain–Frontal–Cortex–BA9             | -4.7            | 2.7e-06         | -0.8         | 0.42         | -4.3                  | 1.4e-05               |
| 2   | <i>MEIS1</i>   | none reported                    | Cells–Transformed–fibroblasts        | 4.1             | 3.7e-05         | -0.28        | 0.78         | 3                     | 0.0027                |
| 2   | <i>MEIS1</i>   | none reported                    | Testis                               | 4.2             | 2.9e-05         | 1.2          | 0.24         | 3.9                   | 9.4e-05               |
| 2   | <i>NRBP1</i>   | none reported                    | Nerve–Tibial                         | -4.1            | 3.8e-05         | -1.4         | 0.17         | -3.8                  | 0.0014                |
| 2   | <i>ETAA1</i>   | none reported                    | Thyroid                              | -4.2            | 2.8e-05         | -0.8         | 0.43         | -3.7                  | 0.00022               |
| 2   | <i>THADA</i>   | <i>THADA</i>                     | Adipose–Subcutaneous                 | 4.2             | 2.7e-05         | 3            | 0.0024       | 4.6                   | 4.4e-06               |
| 3   | <i>IGF2BP2</i> | <i>C3orf65,IGF2BP2</i>           | Thyroid                              | 7.5             | 8.6e-14         | 5.9          | 4.8e-09      | 8.8                   | 1.1e-18               |
| 3   | <i>SENP2</i>   | <i>C3orf65,IGF2BP2</i>           | Adrenal–Gland                        | 5.1             | 3.7e-07         | 0.5          | 0.62         | 4.4                   | 1e-05                 |
| 3   | <i>SFMBT1</i>  | none reported                    | Breast–Mammary–Tissue                | 4.1             | 3.6e-05         | 1.5          | 0.13         | 4                     | 6.2e-05               |
| 3   | <i>POC1A</i>   | none reported                    | Liver                                | -4.1            | 4.6e-05         | -0.55        | 0.58         | -3.5                  | 0.00055               |
| 3   | <i>RPP14</i>   | none reported                    | Skin–Sun–Exposed–Lower–leg           | -4.1            | 3.8e-05         | -0.92        | 0.36         | -3.6                  | 0.00034               |
| 4   | <i>WFS1</i>    | <i>WFS1,PPP2R2C</i>              | Brain–Cerebellar–Hemisphere          | 4.6             | 5e-06           | 4            | 6.4e-05      | 5.8                   | 5.3e-09               |
| 4   | <i>WFS1</i>    | <i>WFS1,PPP2R2C</i>              | Brain–Cerebellum                     | 5.2             | 1.6e-07         | 3.9          | 0.00011      | 6.2                   | 5.7e-10               |
| 4   | <i>WFS1</i>    | <i>WFS1,PPP2R2C</i>              | Cells–Transformed–fibroblasts        | 4.4             | 1.3e-05         | 3.2          | 0.0015       | 4.9                   | 1.1e-06               |
| 4   | <i>WFS1</i>    | <i>WFS1,PPP2R2C</i>              | Heart–Left–Ventricle                 | 4.2             | 2.3e-05         | 2.7          | 0.0066       | 4.7                   | 3e-06                 |
| 4   | <i>WFS1</i>    | <i>WFS1,PPP2R2C</i>              | Nerve–Tibial                         | 5.5             | 3.7e-08         | 4.5          | 6.5e-06      | 6.4                   | 1.7e-10               |
| 4   | <i>WFS1</i>    | <i>WFS1,PPP2R2C</i>              | Skin–Not–Sun–Exposed–Suprapubic      | 5.3             | 1.4e-07         | 5            | 5.5e-07      | 6.6                   | 4.6e-11               |
| 4   | <i>WFS1</i>    | <i>WFS1,PPP2R2C</i>              | Skin–Sun–Exposed–Lower–leg           | 5.7             | 1.1e-08         | 4.6          | 4.7e-06      | 6.6                   | 4.3e-11               |
| 4   | <i>WFS1</i>    | <i>WFS1,PPP2R2C</i>              | Thyroid                              | 5.4             | 7.8e-08         | 4.7          | 2.1e-06      | 6.6                   | 3.5e-11               |
| 4   | <i>EVC</i>     | <i>WFS1,PPP2R2C</i>              | Spleen                               | 5.1             | 4.1e-07         | 3.7          | 0.00022      | 6.2                   | 5.1e-10               |
| 5   | <i>MAST4</i>   | none reported                    | Muscle–Skeletal                      | -4.5            | 5.8e-06         | -0.25        | 0.8          | -3.7                  | 0.00026               |
| 5   | <i>TXNDC15</i> | <i>TXNDC15,PCBD2</i>             | Adipose–Subcutaneous                 | 5               | 4.9e-07         | 1.3          | 0.18         | 4.4                   | 1.1e-05               |
| 5   | <i>TXNDC15</i> | <i>TXNDC15,PCBD2</i>             | Artery–Tibial                        | 4.4             | 1.3e-05         | 1.7          | 0.088        | 4.2                   | 2.1e-05               |
| 5   | <i>TXNDC15</i> | <i>TXNDC15,PCBD2</i>             | Esophagus–Mucosa                     | 4.4             | 1.2e-05         | 2.6          | 0.0081       | 4.7                   | 2.5e-06               |
| 5   | <i>PCBD2</i>   | <i>TXNDC15,PCBD2</i>             | Whole–Blood–DGN                      | -4.6            | 5.1e-06         | -1.7         | 0.081        | -4.3                  | 1.8e-05               |
| 5   | <i>SAR1B</i>   | <i>TXNDC15,PCBD2</i>             | Liver                                | 4.1             | 3.5e-05         | 0.089        | 0.93         | 3.3                   | 0.0011                |
| 6   | <i>TRIM39</i>  | <i>CCHCR1,TCF19,POU5F1,HCG27</i> | Whole–Blood                          | 5.1             | 3.7e-07         | 1.2          | 0.22         | 4.5                   | 5.9e-06               |
| 6   | <i>HCG27</i>   | <i>CCHCR1,TCF19,POU5F1,HCG27</i> | Lung                                 | 4.1             | 3.8e-05         | 1.4          | 0.15         | 3.8                   | 0.00012               |
| 6   | <i>HCG27</i>   | <i>CCHCR1,TCF19,POU5F1,HCG27</i> | Adipose–Subcutaneous                 | 4.3             | 1.5e-05         | 1.2          | 0.24         | 3.8                   | 0.00015               |
| 6   | <i>HCG27</i>   | <i>CCHCR1,TCF19,POU5F1,HCG27</i> | Artery–Tibial                        | 4.2             | 3.3e-05         | 1.3          | 0.2          | 3.9                   | 1e-04                 |
| 6   | <i>HCG27</i>   | <i>CCHCR1,TCF19,POU5F1,HCG27</i> | Colon–Sigmoid                        | 4.2             | 3.1e-05         | 1.2          | 0.23         | 3.9                   | 7.9e-05               |
| 6   | <i>HCG27</i>   | <i>CCHCR1,TCF19,POU5F1,HCG27</i> | Liver                                | 4.1             | 4.7e-05         | 1.7          | 0.083        | 4                     | 5.2e-05               |
| 6   | <i>HCG27</i>   | <i>CCHCR1,TCF19,POU5F1,HCG27</i> | Spleen                               | 4.7             | 2.6e-06         | 1.3          | 0.2          | 4.6                   | 3.9e-06               |
| 6   | <i>C2</i>      | <i>CCHCR1,TCF19,POU5F1,HCG27</i> | Adipose–Subcutaneous                 | 4.3             | 1.5e-05         | 3.5          | 0.00049      | 4.9                   | 9.5e-07               |
| 6   | <i>CYP21A2</i> | <i>CCHCR1,TCF19,POU5F1,HCG27</i> | Adipose–Visceral–Omentum             | 4.1             | 4.5e-05         | 2            | 0.046        | 4.3                   | 2e-05                 |
| 6   | <i>DHX16</i>   | <i>CCHCR1,TCF19,POU5F1,HCG27</i> | Brain–Cerebellar–Hemisphere          | 4.2             | 3e-05           | 1.7          | 0.085        | 4.3                   | 1.6e-05               |
| 6   | <i>ID4</i>     | <i>CDKAL1</i>                    | Vagina                               | -6.2            | 6.3e-10         | -4.7         | 2.4e-06      | -7.9                  | 2.1e-15               |

**Table S3. Tissue-level predicted gene expression associations meet genome-wide significance ( $FDR \leq 0.05$ ) in cross-tissue MetaXcan analysis of the trans-ethnic study.**

Results for genes and corresponding models that meet Bonferroni significance in the trans-ethnic analysis are shown with nearby genes and results from the GERA replication study and meta-analysis of trans-ethnic and GERA Metaxcan associations. Blue shading denotes putative novel T2D genes that are not the most proximal to GWAS associations at  $p < 5 \times 10^{-6}$ . Replication in the GERA study at  $p < 0.05$  is denoted by a pink outline. Pink and red shading denote Bonferroni significance in at least one model and across all models, respectively, for results from meta-analysis of MetaXcan results.

| Chr | Gene      | Reported Genes within 1Mb Locus      | Model                             | DIAGRAM Z-score | DIAGRAM P-value | GERA Z-score | GERA P-value | Meta-analysis Z-score | Meta-analysis P-value |
|-----|-----------|--------------------------------------|-----------------------------------|-----------------|-----------------|--------------|--------------|-----------------------|-----------------------|
| 6   | FAM229B   | none reported                        | Skin-Sun-Exposed-Suprapubic       | -4.1            | 4e-05           | 0.89         | 0.37         | -2.7                  | 0.0061                |
| 6   | KCNK17    | none reported                        | Esophagus-Mucosa                  | -4.4            | 8.6e-06         | -2.1         | 0.04         | -4.5                  | 8e-06                 |
| 6   | HLA-A     | HLA-A                                | Skin-Sun-Exposed-Lower-leg        | 5.4             | 5.1e-08         | 0.68         | 0.5          | 4.5                   | 7.5e-06               |
| 7   | ETV1      | ETV1,DGKB                            | Cells-Transformed-fibroblasts     | -5.1            | 3.3e-07         | -1.1         | 0.27         | -4.4                  | 9.7e-06               |
| 7   | JAZF1     | JAZF1                                | Adipose-Subcutaneous              | -7              | 3.3e-12         | -6.8         | 9.8e-12      | -8.5                  | 2.4e-17               |
| 7   | JAZF1     | JAZF1                                | Adipose-Visceral-Omentum          | -8.1            | 3.7e-16         | -5.8         | 5.5e-09      | -9.5                  | 3.1e-21               |
| 7   | JAZF1     | JAZF1                                | Artery-Aorta                      | -5.9            | 4.7e-09         | -4.7         | 2e-06        | -6.8                  | 7.5e-12               |
| 7   | JAZF1     | JAZF1                                | Artery-Tibial                     | -7.2            | 4.8e-13         | -6.8         | 1.5e-11      | -9                    | 2e-19                 |
| 7   | JAZF1     | JAZF1                                | Cells-Transformed-fibroblasts     | -7              | 3.1e-12         | -3.9         | 0.00012      | -7.2                  | 6.5e-13               |
| 7   | JAZF1     | JAZF1                                | Muscle-Skeletal                   | -8.5            | 2.5e-17         | -5.6         | 2.4e-08      | -9.4                  | 5.9e-21               |
| 7   | JAZF1     | JAZF1                                | Pancreas                          | -7              | 1.8e-12         | -5.5         | 3.2e-08      | -8.3                  | 1.3e-16               |
| 7   | HOXA11    | JAZF1                                | Colon-Sigmoid                     | 4.8             | 2e-06           | 3.2          | 0.0016       | 5.4                   | 6e-08                 |
| 7   | MRPS33    | none reported                        | Cells-Transformed-fibroblasts     | -4.3            | 2.1e-05         | 0.22         | 0.83         | -3.1                  | 0.0018                |
| 7   | MRPS33    | none reported                        | Heart-Atrial-Appendage            | -4.3            | 2.1e-05         | 0.35         | 0.73         | -3.1                  | 0.0017                |
| 8   | VDAC3     | ANK1                                 | Adrenal-Gland                     | -4.8            | 2e-06           | -1.3         | 0.18         | -4.6                  | 4.4e-06               |
| 8   | NDUFAF6   | DPY19L4,INTS8,CCNE2,TP53INP1,NDUFAF6 | Cells-Transformed-fibroblasts     | -4.5            | 6e-06           | -1.2         | 0.22         | -4                    | 5.2e-05               |
| 8   | CCNE2     | DPY19L4,INTS8,CCNE2,TP53INP1,NDUFAF6 | Cells-EBV-transformed-lymphocytes | 4.1             | 5e-05           | 0.69         | 0.49         | 3.5                   | 0.00043               |
| 8   | INTS8     | DPY19L4,INTS8,CCNE2,TP53INP1,NDUFAF6 | Artery-Tibial                     | -4.8            | 1.8e-06         | -1.6         | 0.11         | -4.5                  | 6.1e-06               |
| 8   | INTS8     | DPY19L4,INTS8,CCNE2,TP53INP1,NDUFAF6 | Whole-Blood-DGN                   | -5              | 4.8e-07         | -1.1         | 0.27         | -4.3                  | 1.5e-05               |
| 8   | CCNE2     | DPY19L4,INTS8,CCNE2,TP53INP1,NDUFAF6 | Lung                              | -4.6            | 4.2e-06         | -0.77        | 0.44         | -3.9                  | 1e-04                 |
| 8   | CCNE2     | DPY19L4,INTS8,CCNE2,TP53INP1,NDUFAF6 | Testis                            | 4.5             | 8e-06           | 0.61         | 0.54         | 3.8                   | 0.00012               |
| 8   | CCNE2     | DPY19L4,INTS8,CCNE2,TP53INP1,NDUFAF6 | Whole-Blood-DGN                   | -5.5            | 3e-08           | -1           | 0.31         | -4.7                  | 3e-06                 |
| 8   | TP53INP1  | DPY19L4,INTS8,CCNE2,TP53INP1,NDUFAF6 | Skin-Sun-Exposed-Lower-leg        | -5.3            | 1.2e-07         | -0.43        | 0.66         | -4.2                  | 2.2e-05               |
| 8   | TP53INP1  | DPY19L4,INTS8,CCNE2,TP53INP1,NDUFAF6 | Testis                            | -5.4            | 6.9e-08         | -0.57        | 0.57         | -4.6                  | 5.1e-06               |
| 8   | TP53INP1  | DPY19L4,INTS8,CCNE2,TP53INP1,NDUFAF6 | Whole-Blood-DGN                   | 5.2             | 1.9e-07         | 0.98         | 0.33         | 4.4                   | 1.1e-05               |
| 8   | ZNF703    | none reported                        | Adipose-Subcutaneous              | -4.1            | 4.5e-05         | -2.3         | 0.02         | -4.2                  | 3.1e-05               |
| 8   | ZNF34     | none reported                        | Whole-Blood-DGN                   | 4.4             | 9.5e-06         | 1.5          | 0.12         | 4.1                   | 4.3e-05               |
| 8   | EXT1      | SLC30A8                              | Brain-Caudate-basal-ganglia       | -4.5            | 6.5e-06         | -2.6         | 0.01         | -5.1                  | 3.4e-07               |
| 8   | MED30     | SLC30A8                              | Brain-Hippocampus                 | 4.6             | 4.5e-06         | 0.82         | 0.41         | 4.3                   | 1.5e-05               |
| 8   | RAD21     | SLC30A8                              | Vagina                            | -4.3            | 2e-05           | -1.7         | 0.091        | -4.6                  | 4e-06                 |
| 9   | CDKN2A    | CDKN2B,DMRTA1                        | Adrenal-Gland                     | -5.7            | 1.1e-08         | -3           | 0.003        | -6.2                  | 4.5e-10               |
| 9   | ANKRD20A1 | none reported                        | Breast-Mammary-Tissue             | 5.5             | 4.4e-08         | 0.92         | 0.36         | 4.8                   | 1.9e-06               |
| 10  | HKDC1     | C10orf35,RP11-242G20.1               | Artery-Aorta                      | -4.4            | 9.3e-06         | -2.3         | 0.024        | -4.5                  | 6e-06                 |
| 10  | CAMK1D    | CDC123,CAMK1D                        | Heart-Atrial-Appendage            | 5               | 6.2e-07         | 2.5          | 0.014        | 5.1                   | 2.9e-07               |
| 10  | CAMK1D    | CDC123,CAMK1D                        | Heart-Left-Ventricle              | 4.4             | 9.3e-06         | 3.3          | 0.00081      | 5.1                   | 2.7e-07               |
| 10  | CAMK1D    | CDC123,CAMK1D                        | Lung                              | 4.4             | 1e-05           | 0.34         | 0.74         | 3.5                   | 0.00042               |
| 10  | CAMK1D    | CDC123,CAMK1D                        | Whole-Blood                       | 6               | 2.4e-09         | 3.4          | 0.00066      | 6.3                   | 2.9e-10               |
| 10  | CAMK1D    | CDC123,CAMK1D                        | Whole-Blood-DGN                   | 5.3             | 8.9e-08         | 3.7          | 0.00018      | 5.9                   | 4.7e-09               |
| 10  | NUDT5     | CDC123,CAMK1D                        | Nerve-Tibial                      | -4.2            | 2.6e-05         | -0.86        | 0.39         | -3.6                  | 0.00029               |
| 10  | NUDT5     | CDC123,CAMK1D                        | Whole-Blood-DGN                   | 5.7             | 1.1e-08         | 3.5          | 0.00049      | 6                     | 2e-09                 |

Table S3 (Continued). MetaXcan associations with T2D.

| Chr | Gene     | Reported Genes within 1Mb Locus | Model                                 | DIAGRAM Z-score | DIAGRAM P-value | GERA Z-score | GERA P-value | Meta-analysis Z-score | Meta-analysis P-value |
|-----|----------|---------------------------------|---------------------------------------|-----------------|-----------------|--------------|--------------|-----------------------|-----------------------|
| 10  | HHEX     | IDE,KIF11,HHEX                  | Cells-Transformed-fibroblasts         | -6.9            | 5.9e-12         | -3.8         | 0.00013      | -7.1                  | 1.2e-12               |
| 10  | HHEX     | IDE,KIF11,HHEX                  | Whole-Blood-DGN                       | -6.3            | 3.2e-10         | -2.8         | 0.0046       | -6.1                  | 9.3e-10               |
| 10  | CYP26C1  | IDE,KIF11,HHEX                  | Adipose-Subcutaneous                  | -6.4            | 1.5e-10         | -2.8         | 0.0053       | -6.1                  | 9.3e-10               |
| 10  | CWF19L1  | none reported                   | Breast-Mammary-Tissue                 | -5.5            | 4.6e-08         | -0.76        | 0.45         | -4.7                  | 2.9e-06               |
| 10  | TCF7L2   | TCF7L2                          | Adrenal-Gland                         | 4.1             | 3.5e-05         | -0.018       | 0.99         | 3.4                   | 0.00075               |
| 10  | TCF7L2   | TCF7L2                          | Artery-Aorta                          | -9.5            | 2.5e-21         | -8.9         | 8.7e-19      | -12                   | 2e-31                 |
| 10  | ZDHHC6   | TCF7L2                          | Adipose-Subcutaneous                  | -4.2            | 2.4e-05         | -1.5         | 0.13         | -3.9                  | 1e-04                 |
| 10  | GPAM     | TCF7L2                          | Breast-Mammary-Tissue                 | -5              | 5.6e-07         | -1.5         | 0.14         | -4.7                  | 3e-06                 |
| 10  | DCLRE1A  | TCF7L2                          | Cells-Transformed-fibroblasts         | 5.9             | 3.3e-09         | 5.2          | 2e-07        | 7                     | 1.8e-12               |
| 10  | DCLRE1A  | TCF7L2                          | Thyroid                               | -7.4            | 1.1e-13         | -5           | 4.7e-07      | -8.4                  | 4.9e-17               |
| 10  | NHLRC2   | TCF7L2                          | Cells-Transformed-fibroblasts         | -4.1            | 3.9e-05         | -3.7         | 0.00021      | -4.9                  | 7.7e-07               |
| 10  | CASP7    | TCF7L2                          | Spleen                                | 4.9             | 9.8e-07         | 1.7          | 0.097        | 5                     | 6.4e-07               |
| 10  | SFTPA2   | ZMIZ1                           | Adipose-Subcutaneous                  | 4.1             | 3.7e-05         | 1            | 0.3          | 3.6                   | 0.00035               |
| 11  | TAF1D    | MTNR1B                          | Brain-Nucleus-accumbens-basal-ganglia | 4.2             | 2.9e-05         | 2.8          | 0.0056       | 4.7                   | 2.2e-06               |
| 11  | NCR3LG1  | NCR3LG1,KCNJ11,ABCC8            | Breast-Mammary-Tissue                 | -5.7            | 1.5e-08         | -3.9         | 8.4e-05      | -6.4                  | 1.3e-10               |
| 11  | NCR3LG1  | NCR3LG1,KCNJ11,ABCC8            | Esophagus-Mucosa                      | -5.4            | 8.4e-08         | -2.8         | 0.0044       | -5.6                  | 2.7e-08               |
| 11  | NCR3LG1  | NCR3LG1,KCNJ11,ABCC8            | Heart-Left-Ventricle                  | -4.9            | 1.2e-06         | -1.7         | 0.088        | -4.6                  | 3.3e-06               |
| 11  | NCR3LG1  | NCR3LG1,KCNJ11,ABCC8            | Nerve-Tibial                          | -5.6            | 2.6e-08         | -3.3         | 0.00092      | -5.8                  | 5e-09                 |
| 11  | KCNJ11   | NCR3LG1,KCNJ11,ABCC8            | Esophagus-Mucosa                      | -4.6            | 3.6e-06         | -2.9         | 0.004        | -5                    | 5.1e-07               |
| 11  | KCNJ11   | NCR3LG1,KCNJ11,ABCC8            | Skin-Sun-Exposed-Lower-leg            | -4.3            | 2e-05           | -2.6         | 0.009        | -4.5                  | 6.1e-06               |
| 11  | KCNJ11   | NCR3LG1,KCNJ11,ABCC8            | Whole-Blood-DGN                       | 4.5             | 8.4e-06         | 3.5          | 4e-04        | 5.1                   | 3.8e-07               |
| 11  | TCP11L1  | none reported                   | Muscle-Skeletal                       | 4.1             | 4.3e-05         | -0.24        | 0.81         | 3.1                   | 0.0022                |
| 11  | TCP11L1  | none reported                   | Adipose-Visceral-Omentum              | 4.1             | 3.6e-05         | -0.066       | 0.95         | 3.2                   | 0.0012                |
| 11  | TCP11L1  | none reported                   | Artery-Aorta                          | 4.4             | 1e-05           | -0.055       | 0.96         | 3.4                   | 0.00079               |
| 11  | TCP11L1  | none reported                   | Brain-Cerebellum                      | 4.8             | 1.7e-06         | 0.21         | 0.83         | 3.9                   | 7.9e-05               |
| 11  | TCP11L1  | none reported                   | Esophagus-Mucosa                      | 4.5             | 6.3e-06         | -0.33        | 0.74         | 3.3                   | 0.00088               |
| 11  | TCP11L1  | none reported                   | Esophagus-Muscularis                  | 4.9             | 1.2e-06         | -0.52        | 0.6          | 3.5                   | 0.00045               |
| 11  | TCP11L1  | none reported                   | Heart-Atrial-Appendage                | 4.7             | 3.2e-06         | -0.31        | 0.76         | 3.5                   | 5e-04                 |
| 11  | TCP11L1  | none reported                   | Heart-Left-Ventricle                  | 4.6             | 3.4e-06         | -0.48        | 0.63         | 3.4                   | 0.00071               |
| 11  | TCP11L1  | none reported                   | Pancreas                              | 4.5             | 7e-06           | -0.46        | 0.65         | 3.3                   | 0.0011                |
| 11  | TCP11L1  | none reported                   | Pituitary                             | 4.2             | 2.2e-05         | -0.48        | 0.63         | 3.2                   | 0.0016                |
| 11  | TCP11L1  | none reported                   | Skin-Not-Sun-Exposed-Suprapubic       | 4.4             | 1.2e-05         | -0.93        | 0.35         | 2.9                   | 0.0034                |
| 11  | TCP11L1  | none reported                   | Skin-Sun-Exposed-Lower-leg            | 4.6             | 3.8e-06         | 0.078        | 0.94         | 3.6                   | 0.00038               |
| 11  | TCP11L1  | none reported                   | Thyroid                               | 4.5             | 7.3e-06         | 0.12         | 0.91         | 3.6                   | 0.00034               |
| 11  | MAPK8IP1 | none reported                   | Brain-Hippocampus                     | 4.1             | 4.1e-05         | -0.33        | 0.74         | 3.3                   | 0.001                 |
| 11  | KCNK7    | none reported                   | Lung                                  | -4.4            | 1.1e-05         | 0.33         | 0.74         | -3.2                  | 0.0014                |
| 11  | DEPDC7   | none reported                   | Nerve-Tibial                          | -4.5            | 6.3e-06         | 0.14         | 0.89         | -3.4                  | 0.00077               |
| 12  | P2RX4    | HNF1A,OASL                      | Pancreas                              | 4.2             | 2.3e-05         | 1.5          | 0.13         | 4.1                   | 4.8e-05               |
| 12  | KLHL42   | KLHL42                          | Artery-Tibial                         | -4.8            | 1.9e-06         | NA           | NA           | NA                    | NA                    |
| 12  | KLHL42   | KLHL42                          | Artery-Tibial                         | -4.8            | 1.9e-06         | NA           | NA           | NA                    | NA                    |

Table S3 (Continued). MetaXcan associations with T2D.

| Chr | Gene     | Reported Genes within 1Mb Locus | Model                                | DIAGRAM Z-score | DIAGRAM P-value | GERA Z-score | GERA P-value | Meta-analysis Z-score | Meta-analysis P-value |
|-----|----------|---------------------------------|--------------------------------------|-----------------|-----------------|--------------|--------------|-----------------------|-----------------------|
| 12  | CCDC92   | MPHOSPH9                        | Breast-Mammary-Tissue                | -4.5            | 6.1e-06         | -0.46        | 0.65         | -3.8                  | 0.00016               |
| 12  | C12orf65 | MPHOSPH9                        | Esophagus-Muscularis                 | 4.3             | 1.9e-05         | 0.62         | 0.54         | 3.6                   | 0.00029               |
| 12  | C12orf65 | MPHOSPH9                        | Nerve-Tibial                         | 4.8             | 1.5e-06         | NA           | NA           | NA                    | NA                    |
| 12  | PXMP2    | none reported                   | Esophagus-Muscularis                 | -4.4            | 1.2e-05         | -2.3         | 0.019        | -4.6                  | 5.1e-06               |
| 12  | DNAJC14  | none reported                   | Uterus                               | -4.8            | 1.6e-06         | -1.1         | 0.29         | -4.6                  | 3.3e-06               |
| 14  | VIPAS39  | none reported                   | Nerve-Tibial                         | -4.3            | 1.8e-05         | 0.3          | 0.76         | -3.1                  | 0.0019                |
| 14  | VIPAS39  | none reported                   | Skin-Sun-Exposed-Lower-leg           | -4.2            | 3.1e-05         | 0.1          | 0.92         | -3.1                  | 0.0018                |
| 14  | VIPAS39  | none reported                   | Testis                               | -4.5            | 7.6e-06         | -0.11        | 0.91         | -3.6                  | 0.00032               |
| 14  | VIPAS39  | none reported                   | Thyroid                              | -4.1            | 4.4e-05         | -0.089       | 0.93         | -3.3                  | 0.0011                |
| 14  | NOXRED1  | none reported                   | Nerve-Tibial                         | 4.4             | 1.2e-05         | -0.028       | 0.98         | 3.3                   | 0.00093               |
| 15  | AP3S2    | AP3S2,PRC1,VPS33B               | Prostate                             | 4.1             | 3.6e-05         | 3.1          | 0.0018       | 5.3                   | 1.3e-07               |
| 15  | AP3S2    | AP3S2,PRC1,VPS33B               | Adipose-Subcutaneous                 | 4.3             | 1.8e-05         | 3.8          | 0.00014      | 5                     | 5e-07                 |
| 15  | AP3S2    | AP3S2,PRC1,VPS33B               | Adipose-Visceral-Omentum             | 4.1             | 3.9e-05         | 3.7          | 0.00024      | 5.2                   | 2.6e-07               |
| 15  | AP3S2    | AP3S2,PRC1,VPS33B               | Adrenal-Gland                        | 4.8             | 1.7e-06         | 3.6          | 0.00033      | 5.8                   | 6.4e-09               |
| 15  | AP3S2    | AP3S2,PRC1,VPS33B               | Artery-Aorta                         | 4.3             | 1.5e-05         | 3.4          | 0.00057      | 5                     | 5e-07                 |
| 15  | AP3S2    | AP3S2,PRC1,VPS33B               | Artery-Coronary                      | 5               | 7.3e-07         | 3.7          | 0.00018      | 5.8                   | 7.3e-09               |
| 15  | AP3S2    | AP3S2,PRC1,VPS33B               | Artery-Tibial                        | 4.4             | 1.1e-05         | 3.8          | 0.00012      | 5.3                   | 9.1e-08               |
| 15  | AP3S2    | AP3S2,PRC1,VPS33B               | Brain-Anterior-cingulate-cortex-BA24 | 4.8             | 1.5e-06         | 3.6          | 0.00027      | 6                     | 2.6e-09               |
| 15  | AP3S2    | AP3S2,PRC1,VPS33B               | Brain-Caudate-basal-ganglia          | 4.6             | 4.8e-06         | 3.7          | 2e-04        | 5.8                   | 8.2e-09               |
| 15  | AP3S2    | AP3S2,PRC1,VPS33B               | Brain-Cortex                         | 4.2             | 2.9e-05         | 3            | 0.0023       | 5                     | 7.2e-07               |
| 15  | AP3S2    | AP3S2,PRC1,VPS33B               | Brain-Putamen-basal-ganglia          | 4.4             | 9.5e-06         | 3.5          | 0.00039      | 5.6                   | 2.8e-08               |
| 15  | AP3S2    | AP3S2,PRC1,VPS33B               | Breast-Mammary-Tissue                | 4.2             | 2.1e-05         | 3.8          | 0.00018      | 5.2                   | 1.6e-07               |
| 15  | AP3S2    | AP3S2,PRC1,VPS33B               | Cells-Transformed-fibroblasts        | 4.2             | 3.3e-05         | 3.5          | 0.00048      | 4.9                   | 1.1e-06               |
| 15  | AP3S2    | AP3S2,PRC1,VPS33B               | Colon-Sigmoid                        | 4.6             | 5.1e-06         | 3.8          | 0.00012      | 5.6                   | 2e-08                 |
| 15  | AP3S2    | AP3S2,PRC1,VPS33B               | Colon-Transverse                     | 4.3             | 2e-05           | 3.5          | 0.00054      | 5                     | 4.8e-07               |
| 15  | AP3S2    | AP3S2,PRC1,VPS33B               | Esophagus-Mucosa                     | 4.6             | 5.2e-06         | 3.8          | 0.00017      | 5.4                   | 6.6e-08               |
| 15  | AP3S2    | AP3S2,PRC1,VPS33B               | Heart-Left-Ventricle                 | 5               | 4.8e-07         | 3.9          | 9.8e-05      | 5.9                   | 3.9e-09               |
| 15  | AP3S2    | AP3S2,PRC1,VPS33B               | Liver                                | 4.3             | 1.5e-05         | 3.6          | 3e-04        | 5.2                   | 2e-07                 |
| 15  | AP3S2    | AP3S2,PRC1,VPS33B               | Nerve-Tibial                         | 4.7             | 2.7e-06         | 3.7          | 0.00019      | 5.4                   | 6.9e-08               |
| 15  | AP3S2    | AP3S2,PRC1,VPS33B               | Ovary                                | 4.7             | 2.8e-06         | 3.5          | 0.00046      | 5.5                   | 3.7e-08               |
| 15  | AP3S2    | AP3S2,PRC1,VPS33B               | Pancreas                             | 4.5             | 8.1e-06         | 3.6          | 0.00032      | 5.3                   | 1.2e-07               |
| 15  | AP3S2    | AP3S2,PRC1,VPS33B               | Skin-Sun-Exposed-Lower-leg           | 4.8             | 1.4e-06         | 3.7          | 0.00022      | 5.5                   | 4.1e-08               |
| 15  | AP3S2    | AP3S2,PRC1,VPS33B               | Small-Intestine-Terminal-Ileum       | 5.2             | 1.9e-07         | 3.5          | 0.00046      | 6.3                   | 2.2e-10               |
| 15  | AP3S2    | AP3S2,PRC1,VPS33B               | Stomach                              | 4.9             | 1.1e-06         | 3.5          | 0.00047      | 5.7                   | 1.3e-08               |
| 15  | AP3S2    | AP3S2,PRC1,VPS33B               | Thyroid                              | 4.8             | 1.7e-06         | 3.7          | 0.00023      | 5.6                   | 1.9e-08               |
| 15  | AP3S2    | AP3S2,PRC1,VPS33B               | Uterus                               | 4.8             | 1.5e-06         | 3.6          | 0.00035      | 6                     | 1.6e-09               |
| 15  | PRC1     | AP3S2,PRC1,VPS33B               | Pancreas                             | -4.7            | 3.1e-06         | -2.9         | 0.0037       | -5.1                  | 3.5e-07               |
| 15  | PRC1     | AP3S2,PRC1,VPS33B               | Whole-Blood-DGN                      | -4.4            | 1.1e-05         | -2.1         | 0.033        | -4.3                  | 1.4e-05               |
| 15  | VPS33B   | AP3S2,PRC1,VPS33B               | Pituitary                            | 5               | 5.1e-07         | 1.8          | 0.077        | 5                     | 7e-07                 |
| 15  | VPS33B   | AP3S2,PRC1,VPS33B               | Testis                               | -4.9            | 1.1e-06         | -2.3         | 0.023        | -5                    | 5.1e-07               |

Table S3 (Continued). MetaXcan associations with T2D.

| Chr | Gene    | Reported Genes within 1Mb Locus | Model                                 | DIAGRAM Z-score | DIAGRAM P-value | GERA Z-score | GERA P-value | Meta-analysis Z-score | Meta-analysis P-value |
|-----|---------|---------------------------------|---------------------------------------|-----------------|-----------------|--------------|--------------|-----------------------|-----------------------|
| 15  | VPS33B  | AP3S2,PRC1,VPS33B               | Whole-Blood                           | -4.4            | 9.3e-06         | -1           | 0.3          | -3.9                  | 8.2e-05               |
| 15  | VPS33B  | AP3S2,PRC1,VPS33B               | Whole-Blood-DGN                       | -4.3            | 2.1e-05         | -1.5         | 0.14         | -3.9                  | 8.5e-05               |
| 15  | RCCD1   | AP3S2,PRC1,VPS33B               | Adipose-Subcutaneous                  | 5               | 4.8e-07         | 3.1          | 0.0018       | 5.3                   | 1.5e-07               |
| 15  | RCCD1   | AP3S2,PRC1,VPS33B               | Adipose-Visceral-Omentum              | 4.7             | 3.3e-06         | 2.5          | 0.013        | 5                     | 7e-07                 |
| 15  | RCCD1   | AP3S2,PRC1,VPS33B               | Artery-Aorta                          | 5.4             | 6e-08           | 3.1          | 0.0022       | 5.7                   | 1.4e-08               |
| 15  | RCCD1   | AP3S2,PRC1,VPS33B               | Artery-Coronary                       | 4.6             | 3.7e-06         | 2.4          | 0.015        | 4.9                   | 1.1e-06               |
| 15  | RCCD1   | AP3S2,PRC1,VPS33B               | Artery-Tibial                         | 5.3             | 1.5e-07         | 3.4          | 0.00077      | 5.8                   | 7.8e-09               |
| 15  | RCCD1   | AP3S2,PRC1,VPS33B               | Brain-Anterior-cingulate-cortex-BA24  | 5               | 5.7e-07         | 3.1          | 0.0019       | 5.8                   | 5.8e-09               |
| 15  | RCCD1   | AP3S2,PRC1,VPS33B               | Brain-Caudate-basal-ganglia           | 4.8             | 1.8e-06         | 2.5          | 0.014        | 5.3                   | 1.5e-07               |
| 15  | RCCD1   | AP3S2,PRC1,VPS33B               | Brain-Cerebellar-Hemisphere           | 4.8             | 1.5e-06         | 2.9          | 0.0032       | 5.5                   | 4.1e-08               |
| 15  | RCCD1   | AP3S2,PRC1,VPS33B               | Brain-Cerebellum                      | 5               | 5.8e-07         | 3.4          | 0.00069      | 5.8                   | 8.5e-09               |
| 15  | RCCD1   | AP3S2,PRC1,VPS33B               | Brain-Cortex                          | 5.7             | 1.4e-08         | 3.1          | 0.0018       | 6.2                   | 5.7e-10               |
| 15  | RCCD1   | AP3S2,PRC1,VPS33B               | Brain-Frontal-Cortex-BA9              | 5.7             | 1.5e-08         | 3            | 0.0031       | 6.3                   | 2.7e-10               |
| 15  | RCCD1   | AP3S2,PRC1,VPS33B               | Breast-Mammary-Tissue                 | 5.2             | 1.6e-07         | 2.7          | 0.0079       | 5.5                   | 4.9e-08               |
| 15  | RCCD1   | AP3S2,PRC1,VPS33B               | Cells-Transformed-fibroblasts         | 4.4             | 1e-05           | 1.9          | 0.052        | 4.3                   | 1.7e-05               |
| 15  | RCCD1   | AP3S2,PRC1,VPS33B               | Colon-Sigmoid                         | 5.5             | 4.9e-08         | 2.6          | 0.0097       | 5.7                   | 1.3e-08               |
| 15  | RCCD1   | AP3S2,PRC1,VPS33B               | Colon-Transverse                      | 5.5             | 4.9e-08         | 3.2          | 0.0013       | 5.8                   | 5.5e-09               |
| 15  | RCCD1   | AP3S2,PRC1,VPS33B               | Esophagus-Gastroesophageal-Junction   | 5.4             | 5.1e-08         | 2.4          | 0.015        | 5.7                   | 1.4e-08               |
| 15  | RCCD1   | AP3S2,PRC1,VPS33B               | Esophagus-Mucosa                      | 5               | 4.6e-07         | 3.1          | 0.002        | 5.4                   | 5.3e-08               |
| 15  | RCCD1   | AP3S2,PRC1,VPS33B               | Heart-Left-Ventricle                  | 4.8             | 1.9e-06         | 2.1          | 0.035        | 4.8                   | 1.8e-06               |
| 15  | RCCD1   | AP3S2,PRC1,VPS33B               | Muscle-Skeletal                       | 4.6             | 4.4e-06         | 2.7          | 0.0065       | 4.9                   | 7.9e-07               |
| 15  | RCCD1   | AP3S2,PRC1,VPS33B               | Nerve-Tibial                          | 5.5             | 3e-08           | 3.2          | 0.0014       | 5.8                   | 7.9e-09               |
| 15  | RCCD1   | AP3S2,PRC1,VPS33B               | Skin-Not-Sun-Exposed-Suprapubic       | 5.2             | 1.8e-07         | 3            | 0.0027       | 5.6                   | 2.8e-08               |
| 15  | RCCD1   | AP3S2,PRC1,VPS33B               | Skin-Sun-Exposed-Lower-leg            | 5.2             | 2.2e-07         | 3.1          | 0.0019       | 5.5                   | 4.5e-08               |
| 15  | RCCD1   | AP3S2,PRC1,VPS33B               | Stomach                               | 5.7             | 1.4e-08         | 3.2          | 0.0012       | 6.2                   | 6.1e-10               |
| 15  | RCCD1   | AP3S2,PRC1,VPS33B               | Testis                                | 5.2             | 2.1e-07         | 3.2          | 0.0015       | 5.7                   | 1e-08                 |
| 15  | RCCD1   | AP3S2,PRC1,VPS33B               | Thyroid                               | 5               | 6.3e-07         | 3            | 0.0027       | 5.4                   | 5.6e-08               |
| 15  | RCCD1   | AP3S2,PRC1,VPS33B               | Whole-Blood-DGN                       | 4.8             | 1.9e-06         | 3            | 0.0028       | 5                     | 4.5e-07               |
| 15  | PP1B    | none reported                   | Testis                                | -5.1            | 3.7e-07         | -2.2         | 0.027        | -5.2                  | 2.6e-07               |
| 15  | HMG20A  | PEAK1,HMG20A,LINGO1             | Pituitary                             | 5.5             | 4.5e-08         | 3.4          | 0.00065      | 6.2                   | 6.7e-10               |
| 15  | HMG20A  | PEAK1,HMG20A,LINGO1             | Vagina                                | -4.1            | 4.1e-05         | -0.81        | 0.42         | -4                    | 6.9e-05               |
| 15  | RCN2    | PEAK1,HMG20A,LINGO1             | Colon-Transverse                      | 4.6             | 3.7e-06         | 3.1          | 0.0022       | 5.1                   | 3.2e-07               |
| 15  | ZFAND6  | ZFAND6                          | Brain-Cerebellar-Hemisphere           | 4.5             | 6e-06           | -1.7         | 0.096        | 2.8                   | 0.0048                |
| 15  | ZFAND6  | ZFAND6                          | Brain-Cortex                          | -4.1            | 4.1e-05         | 1.3          | 0.19         | -2.6                  | 0.0085                |
| 15  | FAH     | ZFAND6                          | Brain-Cerebellum                      | 4.2             | 3.3e-05         | -1.2         | 0.24         | 2.7                   | 0.0064                |
| 16  | ZNF771  | none reported                   | Brain-Hippocampus                     | -4.7            | 3.2e-06         | -2           | 0.044        | -5                    | 4.8e-07               |
| 16  | HSDL1   | none reported                   | Liver                                 | -4.1            | 4.1e-05         | 0.93         | 0.35         | -2.7                  | 0.0063                |
| 17  | COP22   | none reported                   | Adipose-Subcutaneous                  | 4.3             | 1.8e-05         | -0.11        | 0.91         | 3.2                   | 0.0016                |
| 17  | SNX11   | none reported                   | Brain-Cerebellar-Hemisphere           | 4.1             | 3.4e-05         | 0.91         | 0.36         | 3.9                   | 0.00011               |
| 17  | SNX11   | none reported                   | Thyroid                               | 4.1             | 4.2e-05         | 0.18         | 0.86         | 3.3                   | 0.00094               |
| 17  | SPATA20 | none reported                   | Esophagus-Gastroesophageal-Junction   | 4.3             | 1.7e-05         | 0.63         | 0.53         | 3.8                   | 0.00014               |
| 19  | CNN1    | none reported                   | Brain-Nucleus-accumbens-basal-ganglia | 5.1             | 3.7e-07         | -0.75        | 0.45         | 3.6                   | 0.00027               |
| 19  | JUND    | none reported                   | Cells-Transformed-fibroblasts         | 4.2             | 2.2e-05         | NA           | NA           | NA                    | NA                    |
| 19  | JUND    | none reported                   | Skin-Sun-Exposed-Lower-leg            | 4.4             | 1.4e-05         | NA           | NA           | NA                    | NA                    |
| 19  | JUND    | none reported                   | Whole-Blood                           | 4.5             | 7.7e-06         | NA           | NA           | NA                    | NA                    |
| 22  | XBP1    | none reported                   | Brain-Cerebellum                      | -4.2            | 3.2e-05         | -1.5         | 0.14         | -4.1                  | 4.2e-05               |
| 22  | MKL1    | none reported                   | Skin-Sun-Exposed-Lower-leg            | -4.3            | 1.9e-05         | -0.88        | 0.38         | -3.7                  | 0.00022               |

Table S3 (Continued). MetaXcan associations with T2D.



| Rank | GO:BP Pathway                                                           | P-value |
|------|-------------------------------------------------------------------------|---------|
| 1    | negative regulation of type B pancreatic cell apoptotic process         | 0.0001  |
| 2    | protein destabilization                                                 | 0.0003  |
| 3    | regulation of type B pancreatic cell apoptotic process                  | 0.001   |
| 4    | type B pancreatic cell apoptotic process                                | 0.001   |
| 5    | response to fructose                                                    | 0.001   |
| 6    | positive regulation of cellular biosynthetic process                    | 0.001   |
| 7    | positive regulation of nitrogen compound metabolic process              | 0.001   |
| 8    | positive regulation of biosynthetic process                             | 0.001   |
| 9    | ATF6-mediated unfolded protein response                                 | 0.001   |
| 10   | positive regulation of transcription, DNA-templated                     | 0.001   |
| 11   | positive regulation of nucleic acid-templated transcription             | 0.001   |
| 12   | positive regulation of nucleobase-containing compound metabolic process | 0.001   |
| 13   | positive regulation of RNA biosynthetic process                         | 0.002   |
| 14   | negative regulation of endoplasmic reticulum unfolded protein response  | 0.002   |
| 15   | fatty acid homeostasis                                                  | 0.002   |
| 16   | positive regulation of triglyceride biosynthetic process                | 0.002   |
| 17   | positive regulation of RNA metabolic process                            | 0.002   |
| 18   | negative regulation of apoptotic signaling pathway                      | 0.002   |
| 19   | stabilization of membrane potential                                     | 0.003   |
| 20   | regulation of epithelial cell apoptotic process                         | 0.003   |

**Table S4. Gene set enrichment analysis of genes corresponding to tissue-level associations at  $FDR \leq 0.05$ .** The top 20 Gene Ontology Biological Process (GO:BP) pathways enriched among the set of MetaXcan-significant genes are shown with overrepresented p-value.

| Rank | GO:BP Pathway                                                                                           | P-value |
|------|---------------------------------------------------------------------------------------------------------|---------|
| 1    | regulation of type B pancreatic cell apoptotic process                                                  | 0.0001  |
| 2    | negative regulation of type B pancreatic cell apoptotic process                                         | 0.0001  |
| 3    | type B pancreatic cell apoptotic process                                                                | 0.0002  |
| 4    | regulation of cyclin-dependent protein serine/threonine kinase activity                                 | 0.0004  |
| 5    | negative regulation of sequence-specific DNA binding transcription factor activity                      | 0.001   |
| 6    | regulation of protein export from nucleus                                                               | 0.001   |
| 7    | negative regulation of cyclin-dependent protein serine/threonine kinase activity                        | 0.001   |
| 8    | negative regulation of epithelial cell apoptotic process                                                | 0.001   |
| 9    | hepatic duct development                                                                                | 0.001   |
| 10   | hepatoblast differentiation                                                                             | 0.001   |
| 11   | regulation of cyclin-dependent protein kinase activity                                                  | 0.001   |
| 12   | positive regulation of nucleobase-containing compound metabolic process                                 | 0.001   |
| 13   | regulation of sequence-specific DNA binding transcription factor activity                               | 0.001   |
| 14   | canonical Wnt signaling pathway involved in positive regulation of epithelial to mesenchymal transition | 0.001   |
| 15   | positive regulation of cellular biosynthetic process                                                    | 0.002   |
| 16   | negative regulation of ATF6-mediated unfolded protein response                                          | 0.002   |
| 17   | negative regulation of cellular macromolecule biosynthetic process                                      | 0.002   |
| 18   | positive regulation of biosynthetic process                                                             | 0.002   |
| 19   | nuclear export                                                                                          | 0.002   |
| 20   | positive regulation of nitrogen compound metabolic process                                              | 0.002   |

**Table S5. Gene set enrichment analysis of *reported* T2D genes corresponding to tissue-level associations at  $FDR \leq 0.05$ .** The top 20 Gene Ontology Biological Process (GO:BP) pathways enriched among the set of MetaXcan-significant genes are shown with overrepresented p-value.

| Rank | GO:BP Pathway                                                                                                                       | P-value |
|------|-------------------------------------------------------------------------------------------------------------------------------------|---------|
| 1    | response to fructose                                                                                                                | 0.001   |
| 2    | fatty acid homeostasis                                                                                                              | 0.001   |
| 3    | stabilization of membrane potential                                                                                                 | 0.001   |
| 4    | embryonic skeletal joint development                                                                                                | 0.001   |
| 5    | menaquinone biosynthetic process                                                                                                    | 0.004   |
| 6    | vitamin K biosynthetic process                                                                                                      | 0.004   |
| 7    | epithelial cell differentiation involved in salivary gland development                                                              | 0.004   |
| 8    | epithelial cell maturation involved in salivary gland development                                                                   | 0.004   |
| 9    | positive regulation of phospholipid biosynthetic process<br>by transcription from RNA polymerase II promoter                        | 0.004   |
| 10   | regulation of plasma cell differentiation                                                                                           | 0.004   |
| 11   | positive regulation of plasma cell differentiation                                                                                  | 0.004   |
| 12   | positive regulation of phospholipid biosynthetic process by positive regulation<br>of transcription from RNA polymerase II promoter | 0.004   |
| 13   | regulation of lactation                                                                                                             | 0.004   |
| 14   | positive regulation of lactation                                                                                                    | 0.004   |
| 15   | negative regulation of activation-induced cell death of T cells                                                                     | 0.005   |
| 16   | protein destabilization                                                                                                             | 0.006   |
| 17   | positive regulation of multicellular organism growth                                                                                | 0.007   |
| 18   | response to fluid shear stress                                                                                                      | 0.008   |
| 19   | rescue of stalled ribosome                                                                                                          | 0.008   |
| 20   | adenine transport                                                                                                                   | 0.008   |

**Table S6. Gene set enrichment analysis of *novel* T2D genes corresponding to tissue-level associations at  $FDR \leq 0.05$ .** The top 20 Gene Ontology Biological Process (GO:BP) pathways enriched among the set of MetaXcan-significant genes are shown with overrepresented p-value.

| Trait                                                                        | P-value | Reported T2D Genes                                                                                                                               | Novel Genes |
|------------------------------------------------------------------------------|---------|--------------------------------------------------------------------------------------------------------------------------------------------------|-------------|
| Type 2 diabetes                                                              | 0.0001  | <i>IGF2BP2, WFS1, PCBD2</i><br><i>ETV1, JAZF1, INTS8</i><br><i>TP53INP1, HHEX, TCF7L2</i><br><i>KCNJ11, HMG20A, ZFAND6</i><br><i>AP3S2, PRC1</i> |             |
| Type 2 diabetes and other traits                                             | 0.0002  | <i>WFS1, TCF7L2</i>                                                                                                                              |             |
| Fasting glucose-related traits<br>(interaction with BMI)                     | 0.001   | <i>IGF2BP2, TCF7L2</i>                                                                                                                           |             |
| Free thyroxine concentration                                                 | 0.002   | <i>JAZF1</i>                                                                                                                                     |             |
| Height                                                                       | 0.002   | <i>IGF2BP2, TXNDC15, PCBD2</i><br><i>JAZF1</i>                                                                                                   |             |
| Colorectal cancer                                                            | 0.002   | <i>PCBD2, TCF7L2</i>                                                                                                                             |             |
| Breast Cancer in BRCA1 mutation carriers                                     | 0.003   | <i>TCF7L2</i>                                                                                                                                    |             |
| Diabetes (gestational)                                                       | 0.005   | <i>IGF2BP2</i>                                                                                                                                   |             |
| Vincristine-induced peripheral neuropathy<br>in acute lymphoblastic leukemia | 0.006   | <i>NDUFAF6</i>                                                                                                                                   |             |
| Two-hour glucose challenge                                                   | 0.007   | <i>TCF7L2</i>                                                                                                                                    |             |
| Breast cancer                                                                | 0.008   | <i>TCF7L2, PRC1</i>                                                                                                                              |             |
| Dehydroepiandrosterone sulphate levels                                       | 0.012   | <i>HHEX</i>                                                                                                                                      |             |
| Proinsulin levels                                                            | 0.013   | <i>TCF7L2</i>                                                                                                                                    |             |
| IgE levels                                                                   | 0.019   | <i>HCG27</i>                                                                                                                                     |             |
| Fasting glucose-related traits                                               | 0.021   | <i>TCF7L2</i>                                                                                                                                    |             |
| Fasting insulin-related traits<br>(interaction with BMI)                     | 0.023   | <i>TCF7L2</i>                                                                                                                                    |             |
| Systemic lupus erythematosus<br>and Systemic sclerosis                       | 0.023   | <i>JAZF1</i>                                                                                                                                     |             |
| Lupus nephritis in systemic lupus<br>erythematosus                           | 0.024   | <i>HCG27</i>                                                                                                                                     |             |
| Social communication problems                                                | 0.025   | <i>KCNJ11</i>                                                                                                                                    |             |
| Glycated hemoglobin levels                                                   | 0.028   | <i>TCF7L2</i>                                                                                                                                    |             |
| Bulimia nervosa                                                              | 0.030   | <i>PCBD2</i>                                                                                                                                     |             |
| Metabolic syndrome                                                           | 0.047   | <i>TCF7L2</i>                                                                                                                                    |             |

**Table S7. Enrichment of reported T2D genes identified in MetaXcan among the set of reported genes from GWAS of other phenotypes.** Tissue-level gene associations at  $FDR \leq 0.05$  corresponding to reported T2D genes based on proximity to T2D-associated SNPs from the trans-ethnic meta-analysis were tested for enrichment among the set of reported genes from all traits in the NHGRI-EBI online catalogue of GWAS results.

| Trait                                                                                        | P-value | Reported T2D Genes                    | Novel Genes                                 |
|----------------------------------------------------------------------------------------------|---------|---------------------------------------|---------------------------------------------|
| Epilepsy (generalized)                                                                       | 0.0001  |                                       | <i>COPZ2, SNX11</i><br><i>MAST4</i>         |
| Waist-to-hip ratio adjusted<br>for body mass index                                           | 0.0004  |                                       | <i>CCDC92, HOXA11</i><br><i>MEIS1, JUND</i> |
| Esophageal squamous cell carcinoma                                                           | 0.001   | <i>CDKN2A</i>                         | <i>XBP1</i>                                 |
| Endometriosis                                                                                | 0.004   | <i>CDKN2A</i>                         | <i>ID4</i>                                  |
| Drug-induced liver injury<br>(amoxicillin-clavulanate)                                       | 0.005   |                                       | <i>HLA-A</i>                                |
| Bronchodilator response in asthma                                                            | 0.007   |                                       | <i>JUND</i>                                 |
| Urate levels in obese individuals                                                            | 0.012   |                                       | <i>EXT1, MED30</i>                          |
| Change in intraocular pressure in response<br>to steroid treatment (triamcinolone acetonide) | 0.012   |                                       | <i>HLA-A</i>                                |
| Abdominal aortic aneurysm                                                                    | 0.014   | <i>CDKN2A</i>                         |                                             |
| Vitiligo                                                                                     | 0.016   |                                       | <i>CASP7, HLA-A</i>                         |
| Treatment response for severe sepsis                                                         | 0.017   |                                       | <i>MKL1</i>                                 |
| Vincristine-induced peripheral neuropathy<br>in acute lymphoblastic leukemia                 | 0.020   |                                       | <i>ETAA1</i>                                |
| Age-related macular degeneration (CNV)                                                       | 0.022   |                                       | <i>C2</i>                                   |
| Restless legs syndrome                                                                       | 0.024   |                                       | <i>MEIS1</i>                                |
| Circulating myeloperoxidase levels (serum)                                                   | 0.025   |                                       | <i>C2</i>                                   |
| Type 2 diabetes                                                                              | 0.026   | <i>CDKN2A, CAMK1D</i><br><i>THADA</i> |                                             |
| Glioma                                                                                       | 0.027   | <i>CDKN2A</i>                         |                                             |
| Esophageal cancer (squamous cell)                                                            | 0.028   |                                       | <i>XBP1</i>                                 |
| Milk allergy                                                                                 | 0.028   |                                       | <i>ETAA1</i>                                |
| Myocardial infarction                                                                        | 0.029   | <i>CDKN2A</i>                         |                                             |
| Nasopharyngeal carcinoma                                                                     | 0.030   |                                       | <i>HLA-A</i>                                |
| Hair morphology                                                                              | 0.031   | <i>THADA</i>                          |                                             |
| Carotid atherosclerosis in HIV infection                                                     | 0.031   |                                       | <i>MAST4</i>                                |
| Platelet count                                                                               | 0.031   | <i>CDKN2A, THADA</i>                  |                                             |
| Cutaneous lupus erythematosus                                                                | 0.037   |                                       | <i>TRIM39</i>                               |
| QT interval (interaction)                                                                    | 0.038   | <i>CAMK1D</i>                         |                                             |
| Glycemic traits (pregnancy)                                                                  | 0.044   |                                       | <i>HKDC1</i>                                |
| Intracranial aneurysm                                                                        | 0.045   | <i>CDKN2A</i>                         |                                             |
| Colorectal cancer (diet interaction)                                                         | 0.048   |                                       | <i>MEIS1</i>                                |
| PR segment                                                                                   | 0.049   |                                       | <i>MEIS1</i>                                |

**Table S8. Enrichment of *novel* T2D genes identified in MetaXcan among the set of reported genes from GWAS of other phenotypes.** Tissue-level gene associations at FDR  $\leq 0.05$  corresponding to novel T2D genes (exceeding 1 Mb from T2D-associated SNPs from the trans-ethnic meta-analysis) were tested for enrichment among the set of reported genes from all traits in the NHGRI-EBI online catalogue of GWAS results.

| Chr | Region Start | Region End | Reported Genes                           | Genome-significant Genes            | Genome-significant Models                                                                                                              | Region-significant Genes                                       | Region-significant Models                                                                                                                                                                                                            |
|-----|--------------|------------|------------------------------------------|-------------------------------------|----------------------------------------------------------------------------------------------------------------------------------------|----------------------------------------------------------------|--------------------------------------------------------------------------------------------------------------------------------------------------------------------------------------------------------------------------------------|
| 2   | 59678302     | 61780702   | BCL11A                                   | NA                                  | NA                                                                                                                                     | BCL11A                                                         | Pancreas                                                                                                                                                                                                                             |
| 2   | 225265364    | 228664475  | NYAP2, IRS1                              | NA                                  | NA                                                                                                                                     | IRS1                                                           | Adipose.Subcutaneous                                                                                                                                                                                                                 |
| 3   | 58735036     | 62237194   | FHIT                                     | NA                                  | NA                                                                                                                                     | FHIT                                                           | Whole.Blood                                                                                                                                                                                                                          |
| 3   | 184361527    | 189608460  | C3orf65, IGF2BP2, ST6GAL1, LPP           | IGF2BP2                             | Thyroid                                                                                                                                | SENP2, ST6GAL1                                                 | Adrenal.Gland, Ovary                                                                                                                                                                                                                 |
| 4   | 5271576      | 7565327    | WFS1, PPP2R2C                            | WFS1, WFS1, WFS1, WFS1              | Brain.Cerebellum, Nerve.Tibial, Skin.Not.Sun.Exposed.Suprapubic, Skin.Sun.Exposed.Lower.leg, Thyroid                                   | EVC, WFS1, WFS1, WFS1, WFS1                                    | Spleen, Brain.Caudate.basal.ganglia, Brain.Cerebellar.Hemisphere, Cells.Transform.ed.fibroblasts, Heart.Left.Ventricle, Muscle.Skeletal                                                                                              |
| 5   | 133209493    | 135343649  | TXNDC15, PCBD2                           | NA                                  | NA                                                                                                                                     | PCBD2, PCBD2, SAR1B, TXNDC15, TXNDC15, TXNDC15, TXNDC15        | Breast.Mammary.Tissue, Whole.Blood.DGN, Liver, Adipose.Subcutaneous, Artery.Aorta, Artery.Tibial, Esophagus.Mucosa                                                                                                                   |
| 5   | 167088745    | 169728133  | SLIT3                                    | NA                                  | NA                                                                                                                                     | SLIT3                                                          | Testis                                                                                                                                                                                                                               |
| 6   | 19534688     | 22232635   | CDKAL1                                   | ID4                                 | Vagina                                                                                                                                 | SOX4                                                           | Muscle.Skeletal                                                                                                                                                                                                                      |
| 6   | 30103949     | 32210949   | CCHCR1, TCF19, POU5F1, HCG27             | NA                                  | NA                                                                                                                                     | C2, CYP21A2, DHX16, HCG27, HCG27, HCG27, HCG27, TRIM39         | Adipose.Subcutaneous, Adipose.Visceral.Omentum, Brain.Cerebellar.Hemisphere, Adipose.Subcutaneous, Artery.Tibial, Colon.Sigmoid, Lung, Spleen, Whole.Blood                                                                           |
| 6   | 125661320    | 127670021  | CENPW                                    | NA                                  | NA                                                                                                                                     | CENPW, RNF146                                                  | Brain.Cortex, Adipose.Visceral.Omentum                                                                                                                                                                                               |
| 7   | 12930853     | 16014402   | ETV1, DGKB                               | NA                                  | NA                                                                                                                                     | ETV1                                                           | Cells.Transform.ed.fibroblasts                                                                                                                                                                                                       |
| 7   | 26870192     | 29220362   | JAZF1                                    | JAZF1, JAZF1, JAZF1, JAZF1, JAZF1   | Adipose.Subcutaneous, Adipose.Visceral.Omentum, Artery.Aorta, Artery.Tibial, Cells.Transform.ed.fibroblasts, Muscle.Skeletal, Pancreas | HGX11                                                          | Colon.Sigmoid                                                                                                                                                                                                                        |
| 8   | 40510739     | 42754280   | ANK1                                     | NA                                  | NA                                                                                                                                     | VDAC3                                                          | Adrenal.Gland                                                                                                                                                                                                                        |
| 8   | 94731931     | 97126883   | DPY19L4, INTS8, CCNE2, TP53INP1, NDUFAF6 | CCNE2, TP53INP1, TP53INP1, TP53INP1 | Whole.Blood.DGN, Skin.Sun.Exposed.Lower.leg, Testis, Whole.Blood.DGN                                                                   | CCNE2, CCNE2, CCNE2, DPY19L4, INTS8, NDUFAF6, NDUFAF6, NDUFAF6 | Adipose.Visceral.Omentum, Cells.EBV-transformed.lymphocytes, Lung, Testis, Heart.Atrial.Appendage, Artery.Tibial, Whole.Blood.DGN, Brain.Cerebellar.Hemisphere, Brain.Cerebellum, Cells.Transform.ed.fibroblasts, Ovary, Whole.Blood |
| 8   | 116962512    | 119188953  | SLC30A8                                  | NA                                  | NA                                                                                                                                     | EIF3H, EXT1, MED30, RAD21                                      | Pancreas, Brain.Caudate.basal.ganglia, Brain.Hippocampus, Vagina                                                                                                                                                                     |
| 9   | 21002902     | 23455739   | CDKN2B, DMRTA1                           | CDKN2A                              | Adrenal.Gland                                                                                                                          | KLHL9                                                          | Brain.Hypothalamus                                                                                                                                                                                                                   |
| 10  | 11237964     | 13292588   | CDC123                                   | CAMK1D, CAMK1D, NUDT5               | Whole.Blood, Whole.Blood.DGN, Whole.Blood.DGN                                                                                          | CAMK1D, CAMK1D, CAMK1D, NUDT5, NUDT5                           | Heart.Atrial.Appendage, Heart.Left.Ventricle, Lung, Nerve.Tibial, Skin.Sun.Exposed.Lower.leg                                                                                                                                         |
| 10  | 70390007     | 72452208   | C10orf35, RP11-242G20.1                  | NA                                  | NA                                                                                                                                     | HKDC1, HKDC1                                                   | Artery.Aorta, Esophagus.Mucosa                                                                                                                                                                                                       |
| 10  | 79828792     | 82076276   | ZMIZ1                                    | NA                                  | NA                                                                                                                                     | PIPF, SFTPA2                                                   | Esophagus.Gastroesophageal.Junction, Adipose.Subcutaneous                                                                                                                                                                            |
| 10  | 93211441     | 95455403   | IDE, KIF11, HHEX                         | HHEX, HHEX, CYP28C1                 | Cells.Transform.ed.fibroblasts, Whole.Blood.DGN, Adipose.Subcutaneous                                                                  | NA                                                             | NA                                                                                                                                                                                                                                   |
| 10  | 113710009    | 115927437  | TCF7L2                                   | TCF7L2, DCLRE1A, DCLRE1A            | Artery.Aorta, Cells.Transform.ed.fibroblasts, Thyroid                                                                                  | CASP7, CASP7, GPAM, GPAM, NHLRC2, TCF7L2, ZDHHC6, ZDHHC6       | Artery.Aorta, Spleen, Breast.Mammary.Tissue, Ovary, Cells.Transform.ed.fibroblasts, Adrenal.Gland, Adipose.Subcutaneous, Muscle.Skeletal                                                                                             |
| 11  | 1465914      | 3870339    | KCNQ1                                    | NA                                  | NA                                                                                                                                     | CARS, INS, KCNQ1, SYT8                                         | Adipose.Subcutaneous, Nerve.Tibial, Prostate, Prostate                                                                                                                                                                               |
| 11  | 16373273     | 18498449   | NCR3LG1, KCNJ11, ABCC8                   | NCR3LG1, NCR3LG1, NCR3LG1           | Breast.Mammary.Tissue, Esophagus.Mucosa, Nerve.Tibial                                                                                  | ABCC8, KCNJ11, KCNJ11, KCNJ11, NCR3LG1                         | Brain.Cortex, Esophagus.Mucosa, Skin.Sun.Exposed.Lower.leg, Whole.Blood.DGN, Heart.Left.Ventricle                                                                                                                                    |
| 11  | 71396114     | 73853306   | ARAP1, STARD10, ATG16L2, FCHSD2          | NA                                  | NA                                                                                                                                     | STARD10                                                        | Whole.Blood.DGN                                                                                                                                                                                                                      |
| 11  | 91702886     | 93718232   | MTNR1B                                   | NA                                  | NA                                                                                                                                     | TAF1D                                                          | Brain.Nucleus.accumbens.basal.ganglia                                                                                                                                                                                                |
| 12  | 26932953     | 28955973   | KLHL42                                   | NA                                  | NA                                                                                                                                     | KLHL42                                                         | Artery.Tibial                                                                                                                                                                                                                        |
| 12  | 70518865     | 72835678   | TSPAN8                                   | NA                                  | NA                                                                                                                                     | CTD-2021H9.3, CTD-2021H9.3, TSPAN8                             | Colon.Transverse, Muscle.Skeletal, Liver                                                                                                                                                                                             |
| 12  | 120418346    | 122477045  | HNF1A, OASL                              | NA                                  | NA                                                                                                                                     | C12orf43, CABP1, P2RX4                                         | Brain.Anterior.cingulate.cortex.BA24, Adipose.Subcutaneous, Pancreas                                                                                                                                                                 |

**Table S9. Genome-wide and window-level significant gene associations at regions spanning T2D-associated loci.**

| Chr | Region Start | Region End | Reported Genes          | Genome-significant Genes                                                                                     | Genome-significant Models                                                                                                                                                                                                                                                                                | Region-significant Genes                                                                                                                                                                                                                                                                                 | Region-significant Models                                                                                                                                                                                                                                                                                                                                                                                                                                                                                                                                                                                                                                                                                                                                                                                                                                                                                                                                                                                                                                                                                |
|-----|--------------|------------|-------------------------|--------------------------------------------------------------------------------------------------------------|----------------------------------------------------------------------------------------------------------------------------------------------------------------------------------------------------------------------------------------------------------------------------------------------------------|----------------------------------------------------------------------------------------------------------------------------------------------------------------------------------------------------------------------------------------------------------------------------------------------------------|----------------------------------------------------------------------------------------------------------------------------------------------------------------------------------------------------------------------------------------------------------------------------------------------------------------------------------------------------------------------------------------------------------------------------------------------------------------------------------------------------------------------------------------------------------------------------------------------------------------------------------------------------------------------------------------------------------------------------------------------------------------------------------------------------------------------------------------------------------------------------------------------------------------------------------------------------------------------------------------------------------------------------------------------------------------------------------------------------------|
| 12  | 122836867    | 124728561  | MPHOSPH9                | NA                                                                                                           | NA                                                                                                                                                                                                                                                                                                       | C12orf65, C12orf65<br>CCDC82, CDK2AP1<br>MPHOSPH9                                                                                                                                                                                                                                                        | Esophagus.Muscularis, Nerve.Tibial<br>Breast.Mammary.Tissue, Nerve.Tibial<br>Artery.Tibial                                                                                                                                                                                                                                                                                                                                                                                                                                                                                                                                                                                                                                                                                                                                                                                                                                                                                                                                                                                                               |
| 15  | 61359176     | 63457482   | C2CD4A, C2CD4B          | NA                                                                                                           | NA                                                                                                                                                                                                                                                                                                       | C2CD4A                                                                                                                                                                                                                                                                                                   | Nerve.Tibial                                                                                                                                                                                                                                                                                                                                                                                                                                                                                                                                                                                                                                                                                                                                                                                                                                                                                                                                                                                                                                                                                             |
| 15  | 76400471     | 79113242   | PEAK1, HMG20A<br>LINGO1 | HMG20A                                                                                                       | Pituitary                                                                                                                                                                                                                                                                                                | HMG20A, HMG20A<br>LINGO1, RCN2                                                                                                                                                                                                                                                                           | Muscle.Skeletal, Vagina<br>Brain.Putamen.basal.ganglia, Colon.Transverse                                                                                                                                                                                                                                                                                                                                                                                                                                                                                                                                                                                                                                                                                                                                                                                                                                                                                                                                                                                                                                 |
| 15  | 79351910     | 81430735   | ZFAND6                  | NA                                                                                                           | NA                                                                                                                                                                                                                                                                                                       | FAH, ZFAND6<br>ZFAND6                                                                                                                                                                                                                                                                                    | Brain.Cerebellum, Brain.Cerebellar.Hemisphere<br>Brain.Cortex                                                                                                                                                                                                                                                                                                                                                                                                                                                                                                                                                                                                                                                                                                                                                                                                                                                                                                                                                                                                                                            |
| 15  | 89373831     | 92565833   | AP3S2, PRC1<br>VPS33B   | AP3S2, RCCD1<br>RCCD1, RCCD1<br>RCCD1, RCCD1<br>RCCD1, RCCD1<br>RCCD1, RCCD1<br>RCCD1, RCCD1<br>RCCD1, RCCD1 | Small Intestine.Terminal.Ileum, Artery.Aorta<br>Artery.Tibial, Brain.Cortex<br>Brain.Frontal.Cortex.BA9, Breast.Mammary.Tissue<br>Colon.Sigmoid, Colon.Transverse<br>Esophagus.Gastroesophageal.Junction, Nerve.Tibial<br>Skin.Not.Sun.Exposed.Suprapubic, Skin.Sun.Exposed.Lower.Leg<br>Stomach, Testis | AP3S2, AP3S2<br>AP3S2, PRC1<br>PRC1, RCCD1<br>RCCD1, RCCD1<br>RCCD1, RCCD1<br>RCCD1, RCCD1<br>RCCD1, RCCD1<br>UNC45A, VPS33B<br>VPS33B, VPS33B<br>VPS33B | Adipose.Subcutaneous, Adipose.Visceral.Omentum<br>Adrenal.Gland, Artery.Aorta<br>Artery.Coronary, Artery.Tibial<br>Brain.Anterior.cingulate.cortex.BA9, Brain.Caudate.basal.ganglia<br>Brain.Cortex, Brain.Frontal.Cortex.BA9<br>Brain.Nucleus.accumbens.basal.ganglia, Brain.Putamen.basal.ganglia<br>Breast.Mammary.Tissue, Cells.EBV-transformed.lymphocytes<br>Cells.Transformed.fibroblasts, Colon.Sigmoid<br>Colon.Transverse, Esophagus.Mucosa<br>Esophagus.Muscularis, Heart.Left.Ventricle<br>Liver, Nerve.Tibial<br>Ovary, Pancreas<br>Prostate, Skin.Sun.Exposed.Lower.leg<br>Stomach, Thyroid<br>Uterus, Pancreas<br>Whole.Blood.DGN, Adipose.Subcutaneous<br>Adipose.Visceral.Omentum, Artery.Coronary<br>Brain.Anterior.cingulate.cortex.BA24, Brain.Caudate.basal.ganglia<br>Brain.Cerebellar.Hemisphere, Brain.Cerebellum<br>Brain.Nucleus.accumbens.basal.ganglia, Cells.Transformed.fibroblasts<br>Esophagus.Mucosa, Esophagus.Muscularis<br>Heart.Left.Ventricle, Muscle.Skeletal<br>Thyroid, Whole.Blood.DGN<br>Muscle.Skeletal, Pituitary<br>Testis, Whole.Blood<br>Whole.Blood.DGN |

**Table S9 (Continued). Genome-wide and window-level significant gene associations at regions spanning T2D-associated loci.**

| Chr | Gene    | Model                           | DIAGRAM<br>Z-score | DIAGRAM<br>p-value | GERA<br>Z-score | GERA<br>p-value |
|-----|---------|---------------------------------|--------------------|--------------------|-----------------|-----------------|
| 2   | BCL11A  | Pancreas                        | 3.95               | 7.82e-05           | 1.49            | 0.137           |
| 2   | IRS1    | Adipose-Subcutaneous            | -3.74              | 0.000181           | -3.22           | 0.00129         |
| 3   | FHIT    | Whole-Blood                     | -2.91              | 0.00357            | -1.78           | 0.0751          |
| 3   | IGF2BP2 | Thyroid                         | 7.46               | 8.58e-14           | 5.86            | 4.77e-09        |
| 3   | SENP2   | Adrenal-Gland                   | 5.08               | 3.73e-07           | 0.501           | 0.616           |
| 3   | ST6GAL1 | Ovary                           | 3.86               | 0.000114           | 0.793           | 0.428           |
| 4   | EVC     | Spleen                          | 5.06               | 4.13e-07           | 3.7             | 0.000219        |
| 4   | WFS1    | Brain-Caudate-basal-ganglia     | -3.75              | 0.00018            | -3.53           | 0.000421        |
| 4   | WFS1    | Brain-Cerebellar-Hemisphere     | 4.56               | 5.03e-06           | 4               | 6.41e-05        |
| 4   | WFS1    | Brain-Cerebellum                | 5.24               | 1.62e-07           | 3.88            | 0.000106        |
| 4   | WFS1    | Cells-Transformed-fibroblasts   | 4.36               | 1.29e-05           | 3.17            | 0.00154         |
| 4   | WFS1    | Heart-Left-Ventricle            | 4.24               | 2.27e-05           | 2.72            | 0.00661         |
| 4   | WFS1    | Muscle-Skeletal                 | 3.67               | 0.000244           | 3.94            | 8.28e-05        |
| 4   | WFS1    | Nerve-Tibial                    | 5.5                | 3.72e-08           | 4.51            | 6.48e-06        |
| 4   | WFS1    | Skin-Not-Sun-Exposed-Suprapubic | 5.26               | 1.43e-07           | 5.01            | 5.54e-07        |
| 4   | WFS1    | Skin-Sun-Exposed-Lower-leg      | 5.72               | 1.08e-08           | 4.58            | 4.72e-06        |
| 4   | WFS1    | Thyroid                         | 5.37               | 7.79e-08           | 4.75            | 2.08e-06        |
| 5   | PCBD2   | Breast-Mammary-Tissue           | -3.69              | 0.000223           | -1.9            | 0.0571          |
| 5   | PCBD2   | Whole-Blood-DGN                 | -4.56              | 5.05e-06           | -1.75           | 0.0807          |
| 5   | SAR1B   | Liver                           | 4.14               | 3.51e-05           | 0.0889          | 0.929           |
| 5   | TXNDC15 | Adipose-Subcutaneous            | 5.03               | 4.92e-07           | 1.33            | 0.182           |
| 5   | TXNDC15 | Artery-Aorta                    | 3.74               | 0.000181           | 1.64            | 0.1             |
| 5   | TXNDC15 | Artery-Tibial                   | 4.36               | 1.28e-05           | 1.7             | 0.0883          |
| 5   | TXNDC15 | Esophagus-Mucosa                | 4.38               | 1.16e-05           | 2.65            | 0.00806         |
| 5   | SLIT3   | Testis                          | 3.86               | 0.000115           | 0.187           | 0.851           |
| 6   | ID4     | Vagina                          | -6.18              | 6.32e-10           | -4.72           | 2.39e-06        |
| 6   | SOX4    | Muscle-Skeletal                 | -3.89              | 1e-04              | -2.94           | 0.00332         |
| 6   | C2      | Adipose-Subcutaneous            | 4.32               | 1.53e-05           | 3.49            | 0.000489        |
| 6   | CYP21A2 | Adipose-Visceral-Omentum        | 4.08               | 4.46e-05           | 1.99            | 0.0465          |
| 6   | DHX16   | Brain-Cerebellar-Hemisphere     | 4.17               | 2.98e-05           | 1.72            | 0.085           |
| 6   | HCG27   | Adipose-Subcutaneous            | 4.32               | 1.53e-05           | 1.19            | 0.236           |
| 6   | HCG27   | Artery-Tibial                   | 4.15               | 3.25e-05           | 1.29            | 0.196           |
| 6   | HCG27   | Colon-Sigmoid                   | 4.17               | 3.1e-05            | 1.21            | 0.226           |
| 6   | HCG27   | Lung                            | 4.12               | 3.78e-05           | 1.44            | 0.15            |
| 6   | HCG27   | Spleen                          | 4.7                | 2.6e-06            | 1.29            | 0.197           |
| 6   | TRIM39  | Whole-Blood                     | 5.08               | 3.73e-07           | 1.21            | 0.225           |
| 6   | CENPW   | Brain-Cortex                    | -3.61              | 0.00031            | -2.79           | 0.00531         |
| 6   | RNF146  | Adipose-Visceral-Omentum        | -3.62              | 0.000297           | -1.64           | 0.101           |
| 7   | ETV1    | Cells-Transformed-fibroblasts   | -5.11              | 3.26e-07           | -1.1            | 0.27            |
| 7   | HOXA11  | Colon-Sigmoid                   | 4.76               | 1.97e-06           | 3.15            | 0.00161         |

**Table S10. Summary table of tissue-level gene associations at regions spanning T2D-associated loci.** MetaXcan Z-scores and *p*-values for all genome-wide and window-level significant gene associations from the discovery analysis (i.e. trans-ethnic study) and GERA replication study are shown. Blue shading indicates *novel* T2D genes. Red shading indicates associations replicating in the GERA study at *p* < 0.05.



| Chr | Gene     | Model                             | DIAGRAM<br>Z-score | DIAGRAM<br>p-value | GERA<br>Z-score | GERA<br>p-value |
|-----|----------|-----------------------------------|--------------------|--------------------|-----------------|-----------------|
| 7   | JAZF1    | Adipose-Subcutaneous              | -6.96              | 3.29e-12           | -6.81           | 9.78e-12        |
| 7   | JAZF1    | Adipose-Visceral-Omentum          | -8.15              | 3.68e-16           | -5.83           | 5.46e-09        |
| 7   | JAZF1    | Artery-Aorta                      | -5.86              | 4.72e-09           | -4.75           | 2.05e-06        |
| 7   | JAZF1    | Artery-Tibial                     | -7.23              | 4.78e-13           | -6.75           | 1.48e-11        |
| 7   | JAZF1    | Cells-Transformed-fibroblasts     | -6.97              | 3.13e-12           | -3.85           | 0.000117        |
| 7   | JAZF1    | Muscle-Skeletal                   | -8.47              | 2.49e-17           | -5.58           | 2.4e-08         |
| 7   | JAZF1    | Pancreas                          | -7.05              | 1.8e-12            | -5.53           | 3.17e-08        |
| 8   | VDAC3    | Adrenal-Gland                     | -4.76              | 1.97e-06           | -1.34           | 0.182           |
| 8   | CCNE2    | Adipose-Visceral-Omentum          | -3.92              | 8.79e-05           | -1.85           | 0.0647          |
| 8   | CCNE2    | Cells-EBV-transformed-lymphocytes | 4.06               | 4.99e-05           | 0.69            | 0.49            |
| 8   | CCNE2    | Lung                              | -4.6               | 4.22e-06           | -0.773          | 0.439           |
| 8   | CCNE2    | Testis                            | 4.47               | 7.99e-06           | 0.61            | 0.542           |
| 8   | CCNE2    | Whole-Blood-DGN                   | -5.54              | 3.03e-08           | -1.02           | 0.309           |
| 8   | DPY19L4  | Heart-Atrial-Appendage            | -3.62              | 0.000297           | 0.216           | 0.829           |
| 8   | INTS8    | Artery-Tibial                     | -4.78              | 1.76e-06           | -1.61           | 0.108           |
| 8   | INTS8    | Whole-Blood-DGN                   | -5.04              | 4.76e-07           | -1.1            | 0.27            |
| 8   | NDUFAF6  | Brain-Cerebellar-Hemisphere       | -3.93              | 8.47e-05           | -1.15           | 0.25            |
| 8   | NDUFAF6  | Brain-Cerebellum                  | -3.8               | 0.000144           | -0.298          | 0.766           |
| 8   | NDUFAF6  | Cells-Transformed-fibroblasts     | -4.52              | 6.05e-06           | -1.24           | 0.216           |
| 8   | NDUFAF6  | Ovary                             | -3.72              | 0.000196           | -0.28           | 0.78            |
| 8   | TP53INP1 | Skin-Sun-Exposed-Lower-leg        | -5.3               | 1.16e-07           | -0.433          | 0.665           |
| 8   | TP53INP1 | Testis                            | -5.4               | 6.85e-08           | -0.573          | 0.566           |
| 8   | TP53INP1 | Whole-Blood                       | 4                  | 6.4e-05            | 1.08            | 0.281           |
| 8   | TP53INP1 | Whole-Blood-DGN                   | 5.21               | 1.9e-07            | 0.982           | 0.326           |
| 8   | EIF3H    | Pancreas                          | -3.76              | 0.000172           | -1.28           | 0.201           |
| 8   | EXT1     | Brain-Caudate-basal-ganglia       | -4.51              | 6.5e-06            | -2.58           | 0.00995         |
| 8   | MED30    | Brain-Hippocampus                 | 4.59               | 4.46e-06           | 0.821           | 0.412           |
| 8   | RAD21    | Vagina                            | -4.27              | 1.96e-05           | -1.69           | 0.0913          |
| 9   | CDKN2A   | Adrenal-Gland                     | -5.71              | 1.1e-08            | -2.97           | 0.00296         |
| 9   | KLHL9    | Brain-Hypothalamus                | 3.94               | 8.19e-05           | 0.988           | 0.323           |
| 10  | CAMK1D   | Heart-Atrial-Appendage            | 4.99               | 6.2e-07            | 2.46            | 0.014           |
| 10  | CAMK1D   | Heart-Left-Ventricle              | 4.43               | 9.29e-06           | 3.35            | 0.000813        |
| 10  | CAMK1D   | Lung                              | 4.41               | 1.02e-05           | 0.335           | 0.737           |
| 10  | CAMK1D   | Whole-Blood                       | 5.97               | 2.42e-09           | 3.4             | 0.000664        |
| 10  | CAMK1D   | Whole-Blood-DGN                   | 5.35               | 8.87e-08           | 3.75            | 0.000177        |
| 10  | NUDT5    | Nerve-Tibial                      | -4.21              | 2.57e-05           | -0.865          | 0.387           |
| 10  | NUDT5    | Skin-Sun-Exposed-Lower-leg        | -3.69              | 0.000221           | -1.64           | 0.102           |
| 10  | NUDT5    | Whole-Blood-DGN                   | 5.71               | 1.13e-08           | 3.48            | 0.000494        |
| 10  | HKDC1    | Artery-Aorta                      | -4.43              | 9.29e-06           | -2.26           | 0.0235          |
| 10  | HKDC1    | Esophagus-Mucosa                  | -3.9               | 9.72e-05           | 1.82            | 0.0681          |

Table S10 (Continued). Summary table of tissue-level gene associations at regions spanning T2D-associated loci.

| Chr | Gene         | Model                                 | DIAGRAM Z-score | DIAGRAM p-value | GERA Z-score | GERA p-value |
|-----|--------------|---------------------------------------|-----------------|-----------------|--------------|--------------|
| 10  | PPIF         | Esophagus-Gastroesophageal-Junction   | 3.78            | 0.000156        | -0.47        | 0.639        |
| 10  | SFTPA2       | Adipose-Subcutaneous                  | 4.13            | 3.67e-05        | 1.03         | 0.302        |
| 10  | CYP26C1      | Adipose-Subcutaneous                  | -6.4            | 1.51e-10        | -2.79        | 0.00526      |
| 10  | HHEX         | Cells-Transformed-fibroblasts         | -6.88           | 5.87e-12        | -3.82        | 0.000131     |
| 10  | HHEX         | Whole-Blood-DGN                       | -6.29           | 3.21e-10        | -2.83        | 0.00461      |
| 10  | CASP7        | Artery-Aorta                          | 3.6             | 0.000315        | 1.89         | 0.0591       |
| 10  | CASP7        | Spleen                                | 4.9             | 9.82e-07        | 1.66         | 0.0967       |
| 10  | DCLRE1A      | Cells-Transformed-fibroblasts         | 5.92            | 3.29e-09        | 5.2          | 2.03e-07     |
| 10  | DCLRE1A      | Thyroid                               | -7.43           | 1.07e-13        | -5.04        | 4.67e-07     |
| 10  | GPAM         | Breast-Mammary-Tissue                 | -5              | 5.61e-07        | -1.47        | 0.141        |
| 10  | GPAM         | Ovary                                 | 4.05            | 5.2e-05         | 3.65         | 0.00026      |
| 10  | NHLRC2       | Cells-Transformed-fibroblasts         | -4.11           | 3.88e-05        | -3.7         | 0.000214     |
| 10  | TCF7L2       | Adrenal-Gland                         | 4.14            | 3.52e-05        | -0.018       | 0.986        |
| 10  | TCF7L2       | Artery-Aorta                          | -9.48           | 2.5e-21         | -8.85        | 8.7e-19      |
| 10  | ZDHHC6       | Adipose-Subcutaneous                  | -4.23           | 2.38e-05        | -1.52        | 0.129        |
| 10  | ZDHHC6       | Muscle-Skeletal                       | -3.97           | 7.1e-05         | -0.124       | 0.901        |
| 11  | CARS         | Adipose-Subcutaneous                  | 3.84            | 0.000124        | -0.673       | 0.501        |
| 11  | INS          | Nerve-Tibial                          | -3.91           | 9.05e-05        | -0.599       | 0.549        |
| 11  | KCNQ1        | Prostate                              | 3.98            | 6.91e-05        | 0.482        | 0.63         |
| 11  | SYT8         | Prostate                              | 3.9             | 9.67e-05        | -0.109       | 0.913        |
| 11  | ABCC8        | Brain-Cortex                          | -3.88           | 0.000103        | -1.4         | 0.16         |
| 11  | KCNJ11       | Esophagus-Mucosa                      | -4.64           | 3.56e-06        | -2.88        | 0.00397      |
| 11  | KCNJ11       | Skin-Sun-Exposed-Lower-leg            | -4.26           | 2.04e-05        | -2.61        | 0.00896      |
| 11  | KCNJ11       | Whole-Blood-DGN                       | 4.45            | 8.39e-06        | 3.54         | 0.000403     |
| 11  | NCR3LG1      | Breast-Mammary-Tissue                 | -5.66           | 1.54e-08        | -3.93        | 8.43e-05     |
| 11  | NCR3LG1      | Esophagus-Mucosa                      | -5.36           | 8.4e-08         | -2.85        | 0.00444      |
| 11  | NCR3LG1      | Heart-Left-Ventricle                  | -4.86           | 1.2e-06         | -1.71        | 0.0877       |
| 11  | NCR3LG1      | Nerve-Tibial                          | -5.56           | 2.62e-08        | -3.31        | 0.000922     |
| 11  | STARD10      | Whole-Blood-DGN                       | 3.87            | 0.000108        | 2.6          | 0.00931      |
| 11  | TAF1D        | Brain-Nucleus-accumbens-basal-ganglia | 4.18            | 2.89e-05        | 2.77         | 0.00557      |
| 12  | KLHL42       | Artery-Tibial                         | -4.76           | 1.89e-06        | NA           | NA           |
| 12  | CTD-2021H9.3 | Colon-Transverse                      | 3.88            | 0.000103        | 2.25         | 0.0244       |
| 12  | CTD-2021H9.3 | Muscle-Skeletal                       | 3.7             | 0.000217        | 2.21         | 0.0269       |
| 12  | TSPAN8       | Liver                                 | 3.81            | 0.000137        | 1.85         | 0.0643       |
| 12  | C12orf43     | Brain-Anterior-cingulate-cortex-BA24  | 3.96            | 7.64e-05        | NA           | NA           |
| 12  | CABP1        | Adipose-Subcutaneous                  | 4.01            | 6.13e-05        | 0.0533       | 0.957        |
| 12  | P2RX4        | Pancreas                              | 4.23            | 2.33e-05        | 1.53         | 0.127        |
| 12  | C12orf65     | Esophagus-Muscularis                  | 4.27            | 1.94e-05        | 0.62         | 0.536        |
| 12  | C12orf65     | Nerve-Tibial                          | 4.81            | 1.49e-06        | NA           | NA           |
| 12  | CCDC92       | Breast-Mammary-Tissue                 | -4.52           | 6.14e-06        | -0.456       | 0.648        |

Table S10 (Continued). Summary table of tissue-level gene associations at regions spanning T2D-associated loci.

| Chr | Gene     | Model                                 | DIAGRAM<br>Z-score | DIAGRAM<br>p-value | GERA<br>Z-score | GERA<br>p-value |
|-----|----------|---------------------------------------|--------------------|--------------------|-----------------|-----------------|
| 12  | CDK2AP1  | Nerve-Tibial                          | 3.93               | 8.37e-05           | NA              | NA              |
| 12  | MPHOSPH9 | Artery-Tibial                         | -4.03              | 5.64e-05           | NA              | NA              |
| 15  | C2CD4A   | Nerve-Tibial                          | -3.78              | 0.00016            | -0.533          | 0.594           |
| 15  | HMG20A   | Muscle-Skeletal                       | 4.04               | 5.36e-05           | 2.61            | 0.00915         |
| 15  | HMG20A   | Pituitary                             | 5.47               | 4.48e-08           | 3.41            | 0.000645        |
| 15  | HMG20A   | Vagina                                | -4.1               | 4.07e-05           | -0.807          | 0.419           |
| 15  | LINGO1   | Brain-Putamen-basal-ganglia           | 3.86               | 0.000112           | 2.27            | 0.0233          |
| 15  | RCN2     | Colon-Transverse                      | 4.63               | 3.73e-06           | 3.06            | 0.00221         |
| 15  | FAH      | Brain-Cerebellum                      | 4.15               | 3.29e-05           | -1.17           | 0.243           |
| 15  | ZFAND6   | Brain-Cerebellar-Hemisphere           | 4.53               | 6.02e-06           | -1.67           | 0.0958          |
| 15  | ZFAND6   | Brain-Cortex                          | -4.1               | 4.07e-05           | 1.3             | 0.193           |
| 15  | AP3S2    | Adipose-Subcutaneous                  | 4.28               | 1.83e-05           | 3.81            | 0.000142        |
| 15  | AP3S2    | Adipose-Visceral-Omentum              | 4.11               | 3.88e-05           | 3.68            | 0.000237        |
| 15  | AP3S2    | Adrenal-Gland                         | 4.79               | 1.69e-06           | 3.59            | 0.000328        |
| 15  | AP3S2    | Artery-Aorta                          | 4.32               | 1.53e-05           | 3.44            | 0.000572        |
| 15  | AP3S2    | Artery-Coronary                       | 4.95               | 7.3e-07            | 3.75            | 0.000179        |
| 15  | AP3S2    | Artery-Tibial                         | 4.39               | 1.13e-05           | 3.84            | 0.000122        |
| 15  | AP3S2    | Brain-Anterior-cingulate-cortex-BA24  | 4.82               | 1.46e-06           | 3.64            | 0.000272        |
| 15  | AP3S2    | Brain-Caudate-basal-ganglia           | 4.57               | 4.81e-06           | 3.72            | 0.000198        |
| 15  | AP3S2    | Brain-Cortex                          | 4.18               | 2.88e-05           | 3.05            | 0.00231         |
| 15  | AP3S2    | Brain-Frontal-Cortex-BA9              | 3.97               | 7.11e-05           | 2.96            | 0.00305         |
| 15  | AP3S2    | Brain-Nucleus-accumbens-basal-ganglia | 3.97               | 7.23e-05           | 2.88            | 0.00399         |
| 15  | AP3S2    | Brain-Putamen-basal-ganglia           | 4.43               | 9.51e-06           | 3.55            | 0.000386        |
| 15  | AP3S2    | Breast-Mammary-Tissue                 | 4.25               | 2.14e-05           | 3.75            | 0.000176        |
| 15  | AP3S2    | Cells-EBV-transformed-lymphocytes     | 4.03               | 5.6e-05            | 3.23            | 0.00122         |
| 15  | AP3S2    | Cells-Transformed-fibroblasts         | 4.15               | 3.26e-05           | 3.49            | 0.000478        |
| 15  | AP3S2    | Colon-Sigmoid                         | 4.56               | 5.15e-06           | 3.84            | 0.000123        |
| 15  | AP3S2    | Colon-Transverse                      | 4.26               | 2.01e-05           | 3.46            | 0.00054         |
| 15  | AP3S2    | Esophagus-Mucosa                      | 4.56               | 5.17e-06           | 3.76            | 0.000168        |
| 15  | AP3S2    | Esophagus-Muscularis                  | 3.94               | 8.04e-05           | 3.5             | 0.000474        |
| 15  | AP3S2    | Heart-Left-Ventricle                  | 5.03               | 4.79e-07           | 3.89            | 9.82e-05        |
| 15  | AP3S2    | Liver                                 | 4.33               | 1.46e-05           | 3.62            | 0.000298        |
| 15  | AP3S2    | Nerve-Tibial                          | 4.69               | 2.69e-06           | 3.74            | 0.000186        |
| 15  | AP3S2    | Ovary                                 | 4.69               | 2.78e-06           | 3.5             | 0.000461        |
| 15  | AP3S2    | Pancreas                              | 4.46               | 8.08e-06           | 3.6             | 0.000322        |
| 15  | AP3S2    | Prostate                              | 4.13               | 3.62e-05           | 3.13            | 0.00177         |
| 15  | AP3S2    | Skin-Sun-Exposed-Lower-leg            | 4.83               | 1.38e-06           | 3.7             | 0.000219        |
| 15  | AP3S2    | Small-Intestine-Terminal-Ileum        | 5.21               | 1.88e-07           | 3.5             | 0.000464        |
| 15  | AP3S2    | Stomach                               | 4.87               | 1.11e-06           | 3.5             | 0.000471        |
| 15  | AP3S2    | Thyroid                               | 4.78               | 1.74e-06           | 3.68            | 0.000231        |

**Table S10 (Continued).** Summary table of tissue-level gene associations at regions spanning T2D-associated loci.

| Chr | Gene   | Model                                 | DIAGRAM<br>Z-score | DIAGRAM<br>p-value | GERA<br>Z-score | GERA<br>p-value |
|-----|--------|---------------------------------------|--------------------|--------------------|-----------------|-----------------|
| 15  | AP3S2  | Uterus                                | 4.81               | 1.53e-06           | 3.57            | 0.000353        |
| 15  | PRC1   | Pancreas                              | -4.67              | 3.06e-06           | -2.9            | 0.0037          |
| 15  | PRC1   | Whole-Blood-DGN                       | -4.39              | 1.15e-05           | -2.13           | 0.0332          |
| 15  | RCCD1  | Adipose-Subcutaneous                  | 5.03               | 4.84e-07           | 3.12            | 0.00181         |
| 15  | RCCD1  | Adipose-Visceral-Omentum              | 4.65               | 3.26e-06           | 2.47            | 0.0134          |
| 15  | RCCD1  | Artery-Aorta                          | 5.42               | 5.96e-08           | 3.06            | 0.00225         |
| 15  | RCCD1  | Artery-Coronary                       | 4.63               | 3.67e-06           | 2.43            | 0.0149          |
| 15  | RCCD1  | Artery-Tibial                         | 5.25               | 1.51e-07           | 3.36            | 0.000773        |
| 15  | RCCD1  | Brain-Anterior-cingulate-cortex-BA24  | 5                  | 5.71e-07           | 3.11            | 0.0019          |
| 15  | RCCD1  | Brain-Caudate-basal-ganglia           | 4.77               | 1.85e-06           | 2.46            | 0.014           |
| 15  | RCCD1  | Brain-Cerebellar-Hemisphere           | 4.81               | 1.5e-06            | 2.95            | 0.00322         |
| 15  | RCCD1  | Brain-Cerebellum                      | 5                  | 5.83e-07           | 3.4             | 0.000686        |
| 15  | RCCD1  | Brain-Cortex                          | 5.67               | 1.4e-08            | 3.12            | 0.00178         |
| 15  | RCCD1  | Brain-Frontal-Cortex-BA9              | 5.67               | 1.46e-08           | 2.95            | 0.00313         |
| 15  | RCCD1  | Brain-Nucleus-accumbens-basal-ganglia | 4.01               | 6e-05              | 2.69            | 0.00706         |
| 15  | RCCD1  | Breast-Mammary-Tissue                 | 5.24               | 1.63e-07           | 2.65            | 0.00795         |
| 15  | RCCD1  | Cells-Transformed-fibroblasts         | 4.41               | 1.03e-05           | 1.94            | 0.0521          |
| 15  | RCCD1  | Colon-Sigmoid                         | 5.46               | 4.86e-08           | 2.59            | 0.00972         |
| 15  | RCCD1  | Colon-Transverse                      | 5.46               | 4.88e-08           | 3.21            | 0.00134         |
| 15  | RCCD1  | Esophagus-Gastroesophageal-Junction   | 5.45               | 5.08e-08           | 2.44            | 0.0146          |
| 15  | RCCD1  | Esophagus-Mucosa                      | 5.04               | 4.62e-07           | 3.09            | 0.00199         |
| 15  | RCCD1  | Esophagus-Muscularis                  | 4.02               | 5.71e-05           | 2.45            | 0.0144          |
| 15  | RCCD1  | Heart-Left-Ventricle                  | 4.77               | 1.87e-06           | 2.11            | 0.0352          |
| 15  | RCCD1  | Muscle-Skeletal                       | 4.59               | 4.4e-06            | 2.72            | 0.00655         |
| 15  | RCCD1  | Nerve-Tibial                          | 5.54               | 2.99e-08           | 3.19            | 0.00143         |
| 15  | RCCD1  | Skin-Not-Sun-Exposed-Suprapubic       | 5.22               | 1.78e-07           | 3.01            | 0.00265         |
| 15  | RCCD1  | Skin-Sun-Exposed-Lower-leg            | 5.19               | 2.15e-07           | 3.11            | 0.00186         |
| 15  | RCCD1  | Stomach                               | 5.68               | 1.38e-08           | 3.24            | 0.00121         |
| 15  | RCCD1  | Testis                                | 5.19               | 2.09e-07           | 3.18            | 0.00149         |
| 15  | RCCD1  | Thyroid                               | 4.98               | 6.34e-07           | 3               | 0.00267         |
| 15  | RCCD1  | Whole-Blood-DGN                       | 4.77               | 1.87e-06           | 2.99            | 0.00282         |
| 15  | UNC45A | Muscle-Skeletal                       | 3.93               | 8.38e-05           | 0.011           | 0.991           |
| 15  | VPS33B | Pituitary                             | 5.02               | 5.09e-07           | 1.77            | 0.0767          |
| 15  | VPS33B | Testis                                | -4.88              | 1.06e-06           | -2.27           | 0.023           |
| 15  | VPS33B | Whole-Blood                           | -4.43              | 9.26e-06           | -1.03           | 0.302           |
| 15  | VPS33B | Whole-Blood-DGN                       | -4.25              | 2.11e-05           | -1.49           | 0.137           |

**Table S10 (Continued).** Summary table of tissue-level gene associations at regions spanning T2D-associated loci.

| Tissue                                | Mean Square Z-score Rank | Sample Size Rank | Sample Size | Mean Square Z-score |
|---------------------------------------|--------------------------|------------------|-------------|---------------------|
| Whole-Blood-DGN                       | 1                        | 1                | 922         | 1.17                |
| Adipose-Subcutaneous                  | 2                        | 5                | 298         | 1.152               |
| Muscle-Skeletal                       | 3                        | 2                | 361         | 1.147               |
| Nerve-Tibial                          | 4                        | 10               | 256         | 1.14                |
| Artery-Tibial                         | 5                        | 6                | 285         | 1.138               |
| Cells-Transformed-fibroblasts         | 6                        | 9                | 272         | 1.136               |
| Skin-Sun-Exposed-Lower-leg            | 7                        | 4                | 302         | 1.133               |
| Whole-Blood                           | 8                        | 3                | 338         | 1.129               |
| Breast-Mammary-Tissue                 | 9                        | 17               | 183         | 1.117               |
| Pancreas                              | 10                       | 22               | 149         | 1.109               |
| Lung                                  | 11                       | 7                | 278         | 1.108               |
| Thyroid                               | 12                       | 8                | 278         | 1.104               |
| Liver                                 | 13                       | 30               | 97          | 1.1                 |
| Artery-Aorta                          | 14                       | 13               | 197         | 1.099               |
| Esophagus-Muscularis                  | 15                       | 12               | 218         | 1.095               |
| Adrenal-Gland                         | 16                       | 24               | 126         | 1.081               |
| Adipose-Visceral-Omentum              | 17                       | 16               | 185         | 1.079               |
| Esophagus-Mucosa                      | 18                       | 11               | 241         | 1.078               |
| Skin-Not-Sun-Exposed-Suprapubic       | 19                       | 14               | 196         | 1.071               |
| Colon-Transverse                      | 20                       | 19               | 169         | 1.068               |
| Testis                                | 21                       | 21               | 157         | 1.067               |
| Heart-Atrial-Appendage                | 22                       | 20               | 159         | 1.066               |
| Stomach                               | 23                       | 18               | 170         | 1.063               |
| Heart-Left-Ventricle                  | 24                       | 15               | 190         | 1.062               |
| Brain-Cortex                          | 25                       | 31               | 96          | 1.061               |
| Cells-EBV-transformed-lymphocytes     | 26                       | 27               | 114         | 1.057               |
| Esophagus-Gastroesophageal-Junction   | 27                       | 23               | 127         | 1.044               |
| Vagina                                | 28                       | 42               | 79          | 1.041               |
| Brain-Nucleus-accumbens-basal-ganglia | 29                       | 32               | 93          | 1.034               |
| Spleen                                | 30                       | 35               | 89          | 1.032               |
| Ovary                                 | 31                       | 38               | 85          | 1.029               |
| Colon-Sigmoid                         | 32                       | 25               | 124         | 1.026               |
| Brain-Cerebellum                      | 33                       | 28               | 103         | 1.02                |
| Artery-Coronary                       | 34                       | 26               | 118         | 1.018               |
| Brain-Putamen-basal-ganglia           | 35                       | 39               | 82          | 1.003               |
| Brain-Cerebellar-Hemisphere           | 36                       | 34               | 89          | 1.001               |
| Uterus                                | 37                       | 45               | 70          | 1                   |
| Small-Intestine-Terminal-Ileum        | 38                       | 43               | 77          | 0.9984              |
| Brain-Caudate-basal-ganglia           | 39                       | 29               | 100         | 0.9933              |
| Pituitary                             | 40                       | 36               | 87          | 0.9859              |
| Brain-Frontal-Cortex-BA9              | 41                       | 33               | 92          | 0.9843              |
| Brain-Hypothalamus                    | 42                       | 41               | 81          | 0.968               |
| Brain-Hippocampus                     | 43                       | 40               | 81          | 0.9582              |
| Brain-Anterior-cingulate-cortex-BA24  | 44                       | 44               | 72          | 0.9534              |
| Prostate                              | 45                       | 37               | 87          | 0.9217              |

**Table S11. Tissue models ranked by mean square Z-score from predicted gene associations in the trans-ethnic analysis.** Shading indicates enriched tissue models based on mean square Z-score rank being less than sample size rank.

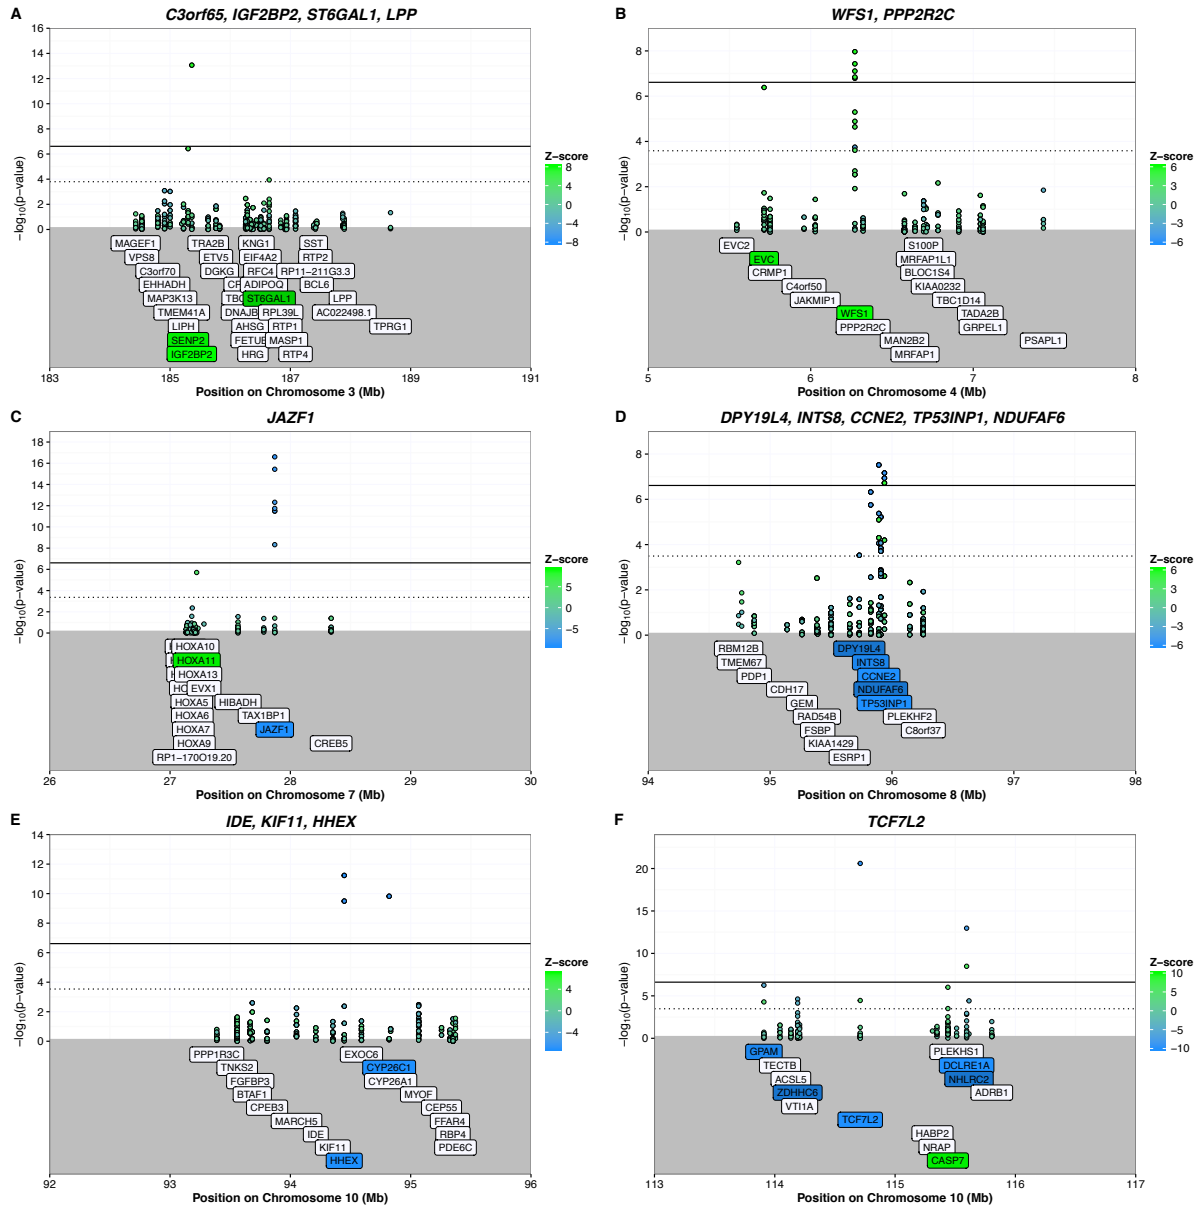

**Figure S1.** MetaXcan profiles at regions with at least one *reported* gene meeting cross-tissue Bonferroni significance. Solid and dotted lines denote Bonferroni (cross-tissue) and locus-level significance thresholds, respectively. Green and blue fill indicate positive and negative direction of associations (i.e. sign of Z-score), respectively. Label shading shows direction for the top tissue-level association for each meeting MetaXcan significance thresholds.

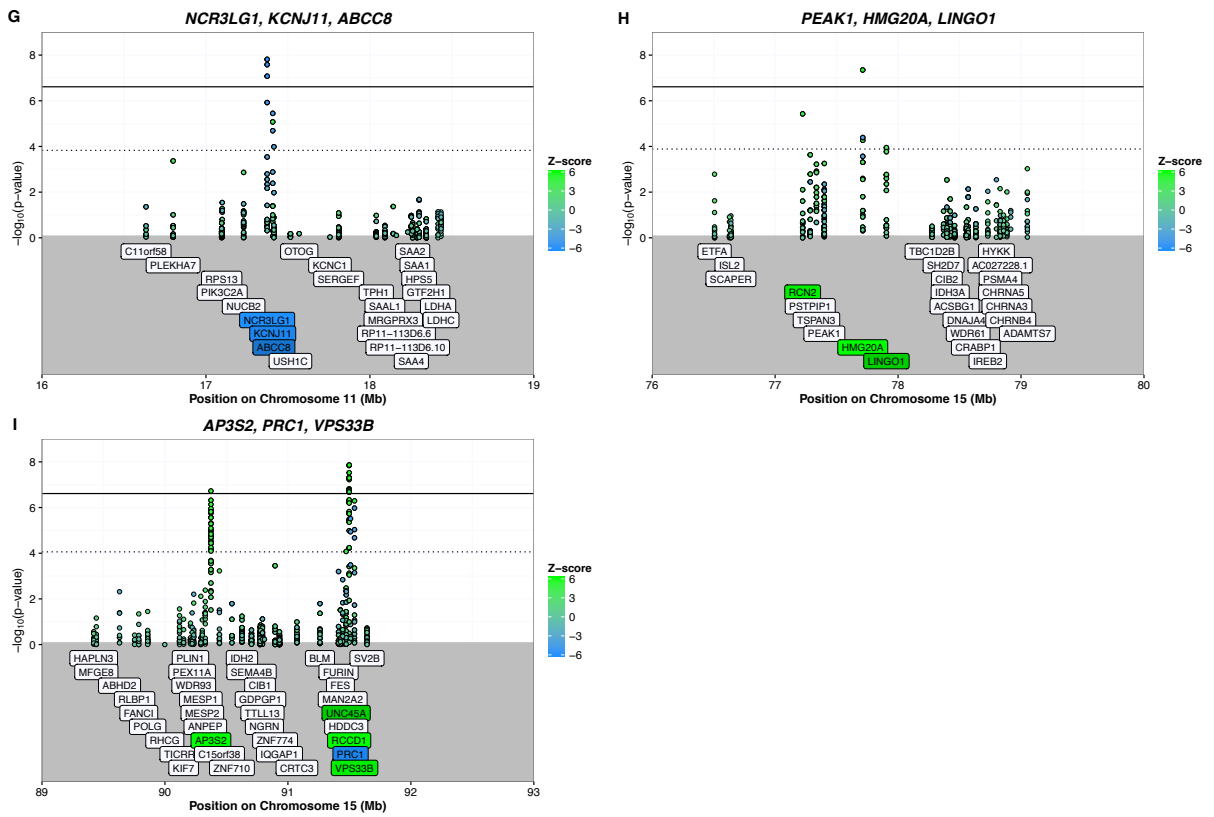

Figure S1 (Continued). MetaXcan profiles at T2D-associated loci

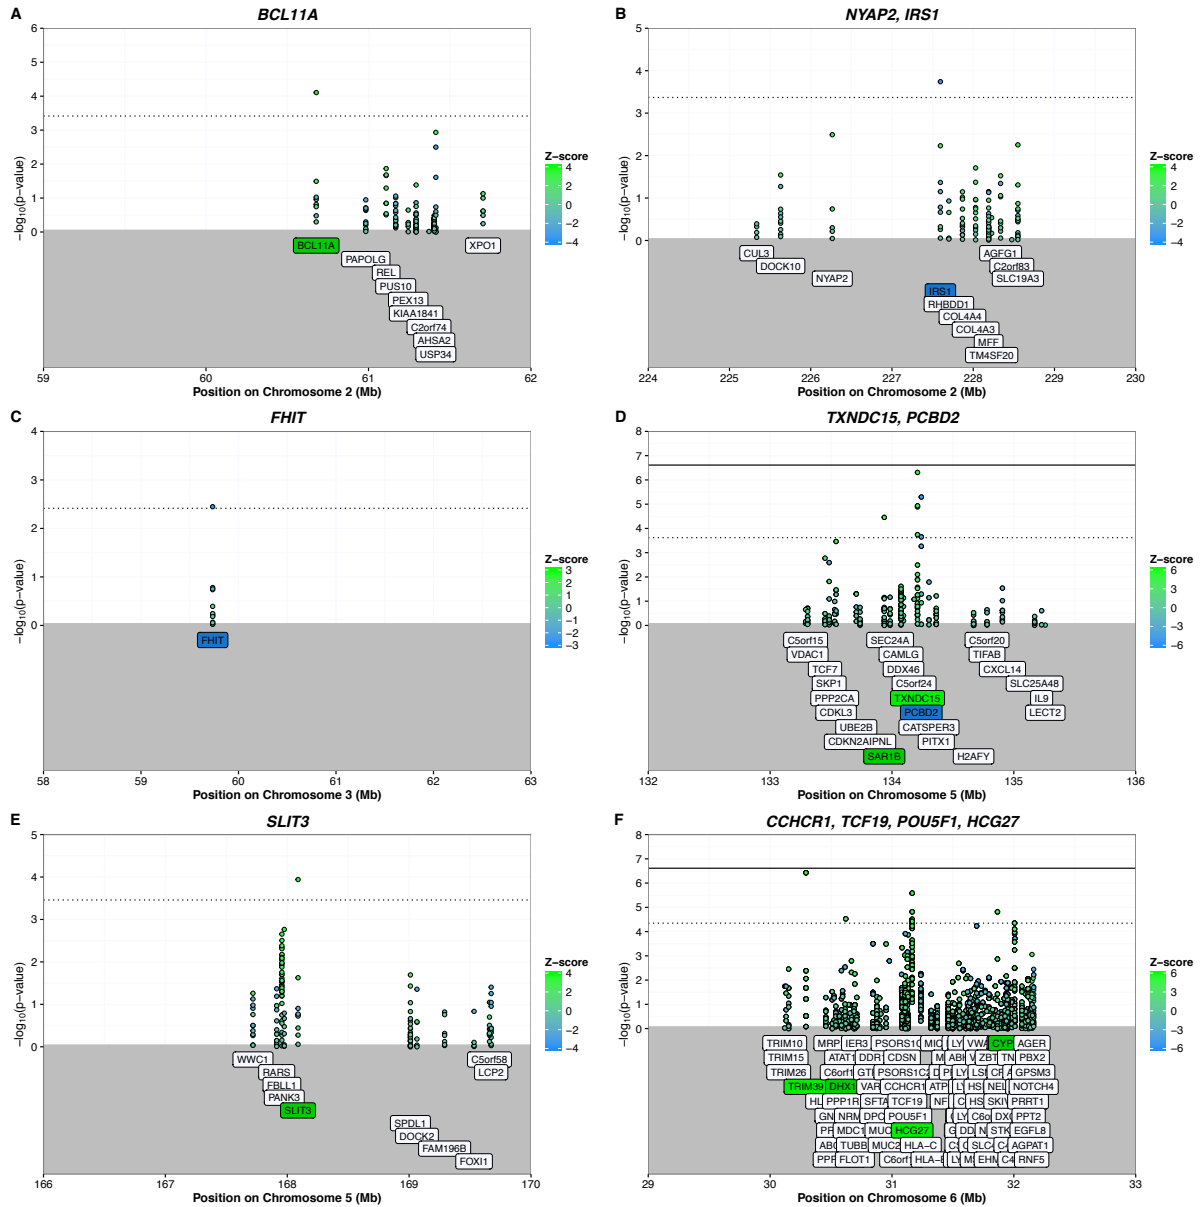

**Figure S2. MetaXcan profiles at regions with at least one reported gene meeting locus-level significance.** Solid and dotted lines denote Bonferroni (cross-tissue) and locus-level significance thresholds, respectively. Green and blue fill indicate positive and negative direction of associations (i.e. sign of Z-score), respectively. Label shading shows direction for the top x association for each meeting MetaXcan significance thresholds.



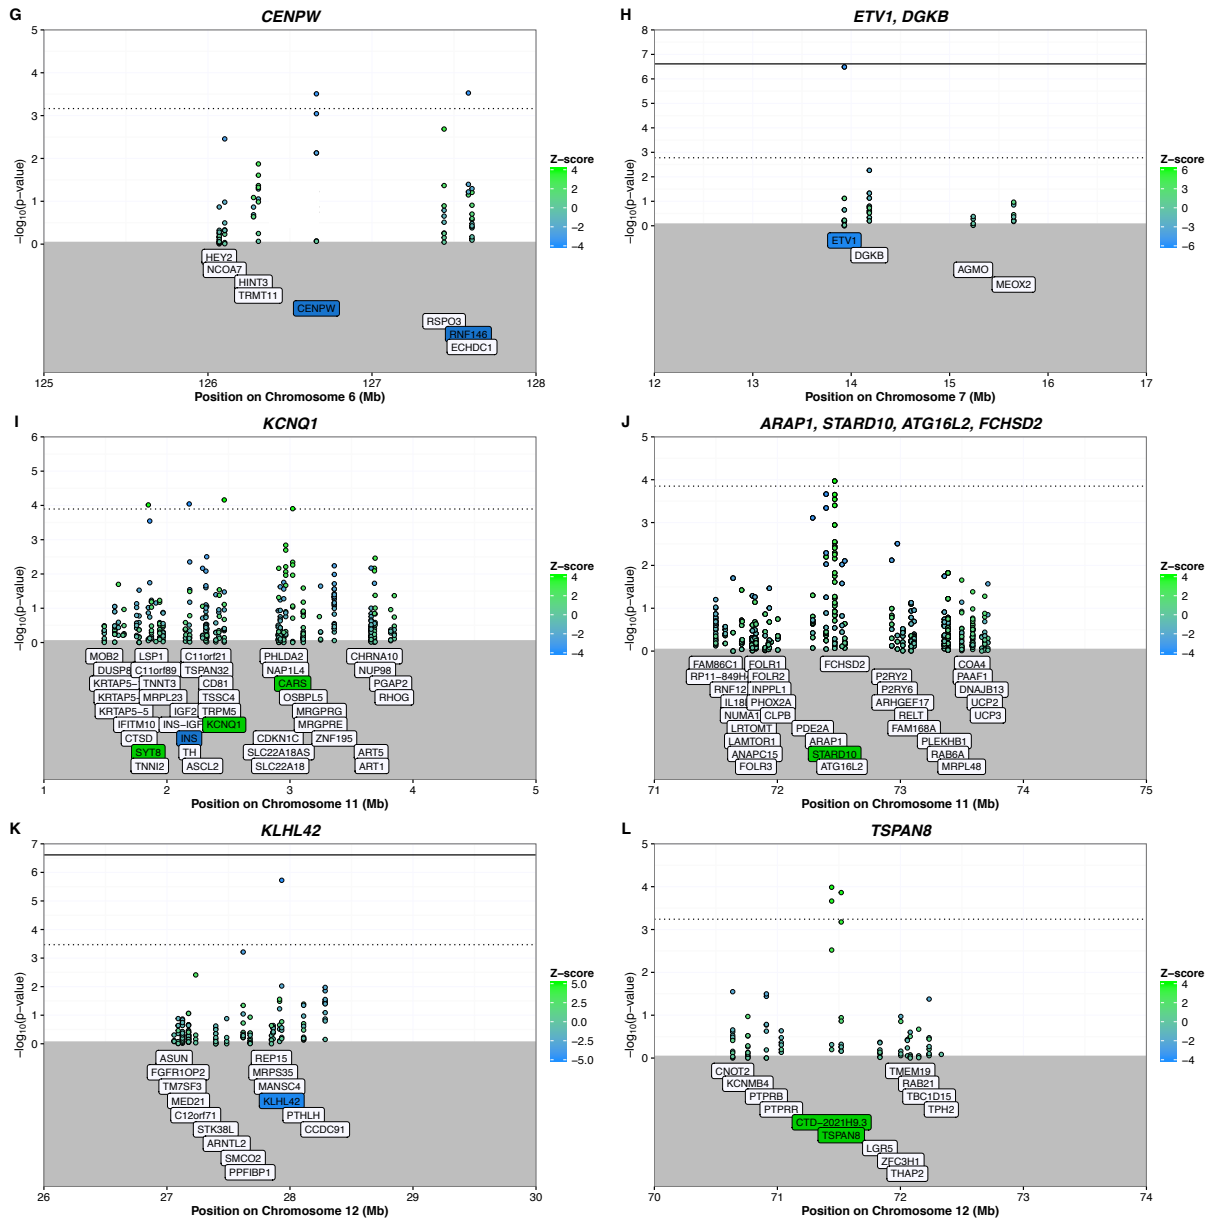

Figure S2 (Continued). MetaXcan profiles at T2D-associated loci

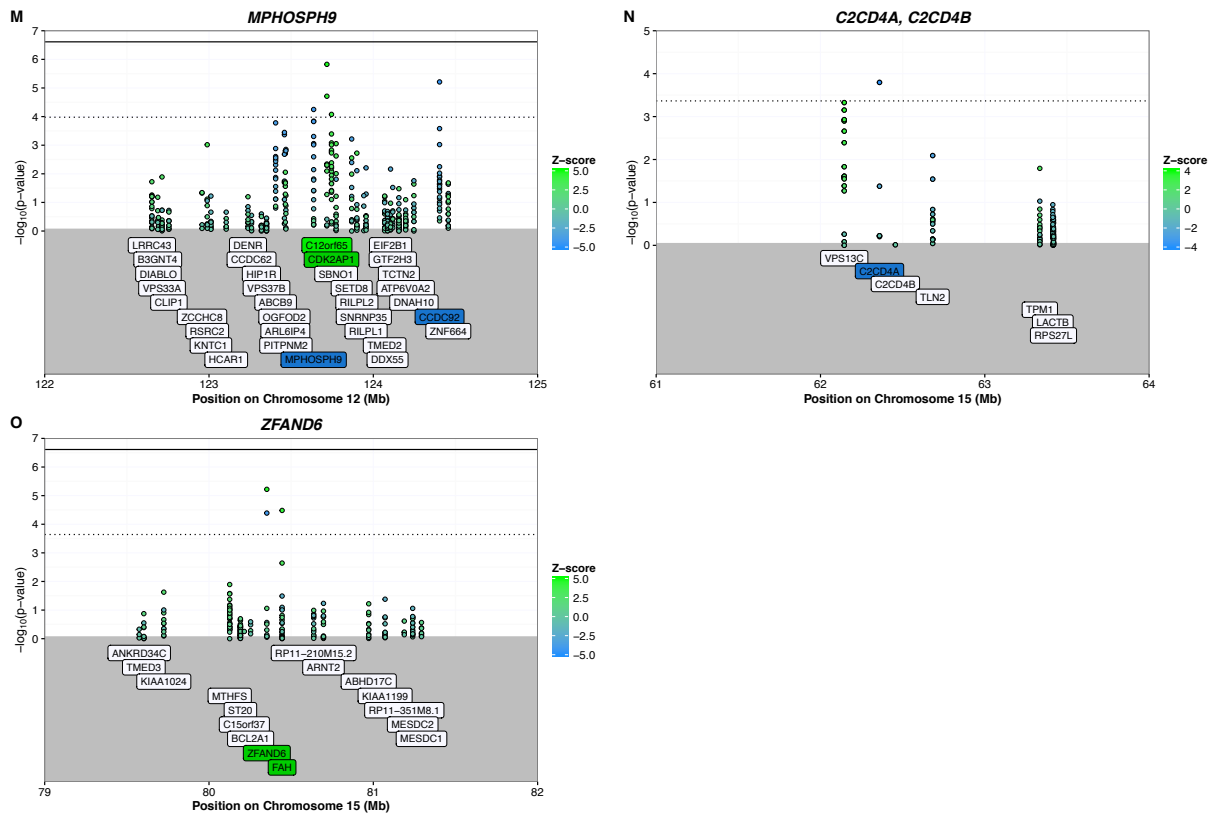

Figure S2 (Continued). MetaXcan profiles at T2D-associated loci

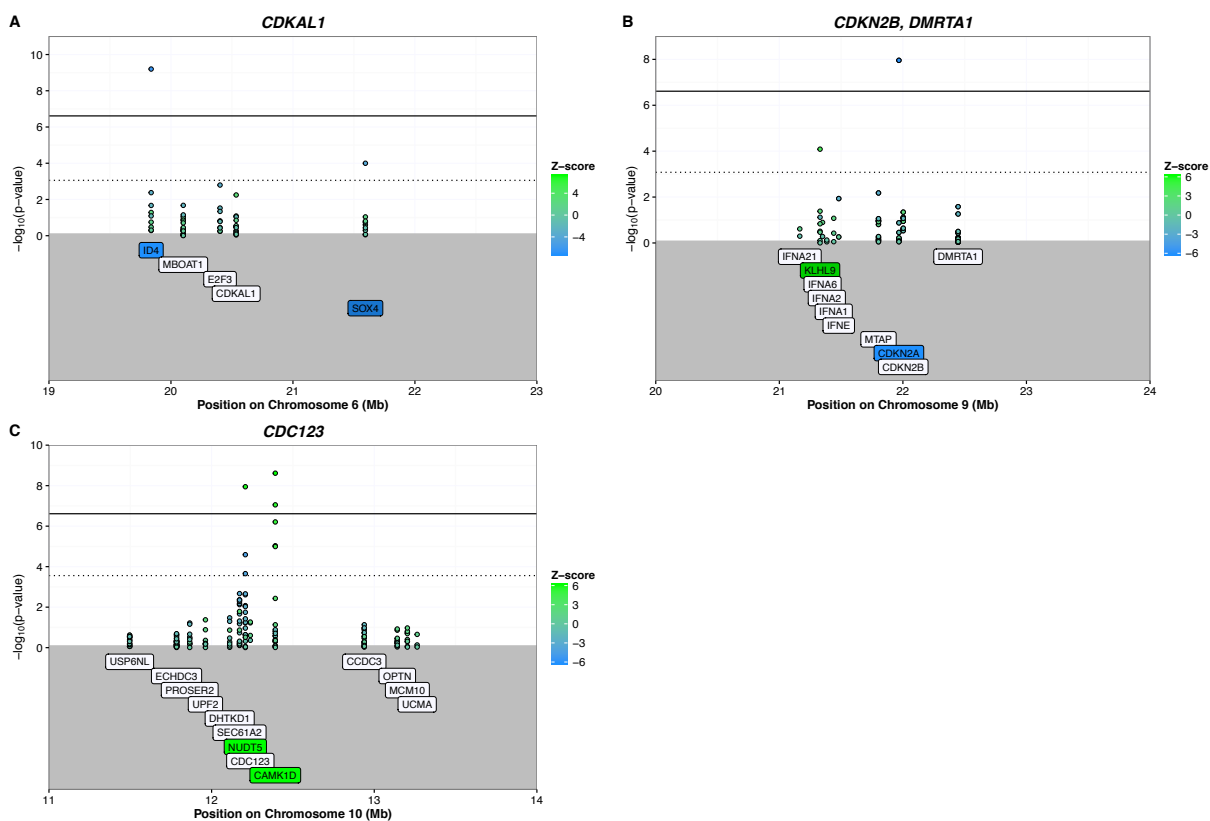

**Figure S3. MetaXcan profiles at regions with at least one *novel* gene meeting cross-tissue Bonferroni significance and no significant associations for *reported* T2D genes.** Solid and dotted lines denote Bonferroni (cross-tissue) and locus-level significance thresholds, respectively. Green and blue fill indicate positive and negative direction of associations (i.e. sign of Z-score), respectively. Label shading shows direction for the top tissue-level association for each meeting MetaXcan significance thresholds. Note that *CAMK1D* does not map to within 1 Mb of T2D-associated SNPs ( $p < 5 \times 10^{-6}$ ) in the trans-ethnic study and is therefore not considered a *reported* gene in this study although it is reported elsewhere.

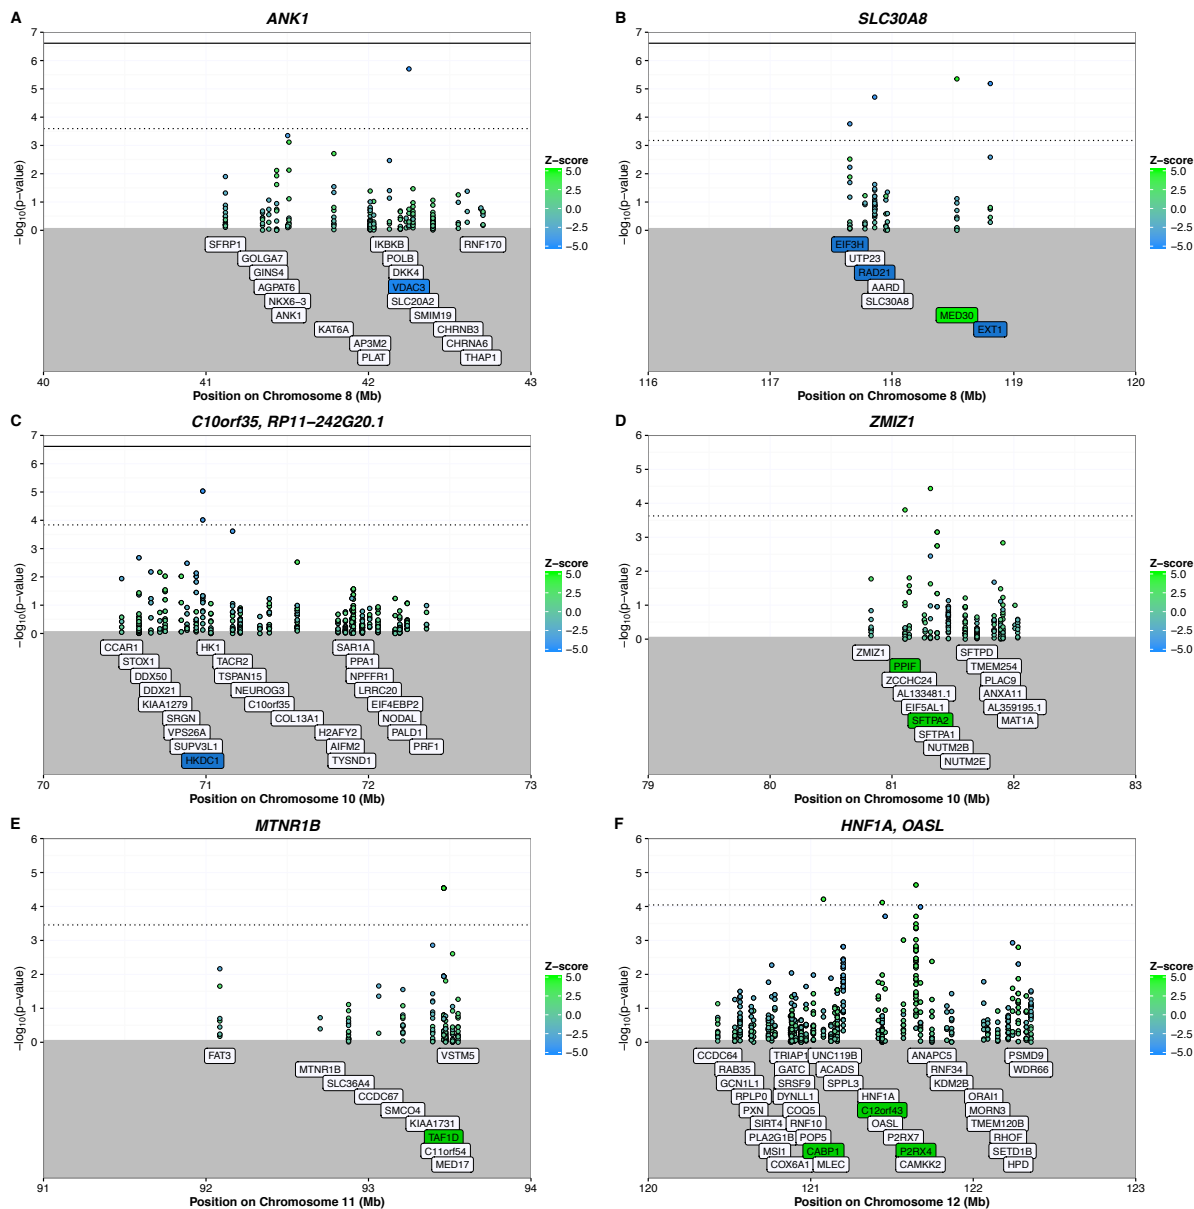

**Figure S4.** MetaXcan profiles at regions with at least one *novel* gene meeting locus-level significance and no significant associations for *reported* T2D genes. Solid and dotted lines denote Bonferroni (cross-tissue) and locus-level significance thresholds, respectively. Green and blue fill indicate positive and negative direction of associations (i.e. sign of Z-score), respectively. Label shading shows direction for the top tissue-level association for each meeting MetaXcan significance thresholds.
